# Supplementary material for: Antagonistic role of the BTB-zinc finger transcription factors Chinmo and Broad-Complex in the juvenile/pupal transition and in growth control
Source: eLife. 2023 Apr 28;12:e84648. doi: 10.7554/eLife.84648 (PMC10234633; doi:10.7554/eLife.84648)
Supplement: Figure 1—source data 1. [file elife-84648-fig1-data1.xlsx]

## Sheet: Figure 1 A
	Chinmo			rpl32
Sample	Ct	Ct average	sd	Ct	Ct average	sd	delta Ct	sd	Nro copies	sd			mean	desvest	sem
embryo 1	28.4197	28.4066	0.0185099	24.7587	24.7869	0.0398399	-3.61969	0.0439299	0.0813515	0.00247714		Embryo	0.0914733	0.0143143	0.00826437
	28.3935			24.8151								L1	0.0378478	0.0263558	0.0152166
embryo 2	28.2622	28.5452	0.400225	25.2461	25.2461	0.009	-3.2991	0.400326	0.101595	0.0281911		L2	0.0669978	0.0311322	0.0179742
	28.8282			25.26								L3e	0.0370092	0.0462004	0.0266738
L1 1	29.3977	29.31	0.117568	24.6531	24.6144	0.0546981	-4.69555	0.129669	0.0385921	0.00346865		L3 mid	0.0431551	0.0123727	0.00714341
	29.2315			24.5758								L3 late	0.028035	0.0125528	0.00724736
L1 2	32.6805	32.5457	0.19064	26.0902	26.0559	0.0483923	-6.48971	0.196686	0.0111277	0.00151706		Pd0	0.0425706	0.0108084	0.00624026
	32.4108			26.0217
L1 3	29.8298	30.0184	0.26679	26.1449	26.0486	0.136076	-3.96977	0.299489	0.0638236	0.0132491
	30.2071			25.9524
L2 1	34.1026	33.9718	0.185006	27.0473	27.0156	0.0448944	-6.9562	0.190376	0.00805331	0.0010627
	33.841			26.9838
L2 2	28.6139	28.7436	0.18343	24.3045	24.2692	0.0499097	-4.47444	0.190099	0.044984	0.0059274
	28.8733			24.2339
L2 3	28.5319	28.681	0.210909	25.2333	25.1912	0.0596521	-3.48986	0.219182	0.0890116	0.0135231
	28.8302			25.149
L3e 1	31.8402	31.8375	0.00383304	25.9823	25.946	0.0513892	-5.89153	0.0515319	0.016845	0.000601691
	31.8348			25.9096
L3e 2	27.6898	27.9188	0.323794	24.6175	24.6381	0.0291909	-3.28065	0.325107	0.102903	0.0231888
	28.1477			24.6588
L3e 3	29.6613	29.5816	0.112756	24.8529	24.8256	0.0385213	-4.75597	0.119155	0.0370092	0.00305665
	29.5019			24.7984
L3mid 1	29.9287	29.8427	0.121567	25.1161	25.1214	0.00747867	-4.72135	0.121797	0.0379082	0.00320033
	29.7568			25.1267
L3mid 2	31.0428	31.1874	0.204444	27.204	27.1635	0.0572494	-4.02387	0.212309	0.0614746	0.00904667
	31.3319			27.123
L3mid 3	31.263	31.6574	0.557757	27.1162	27.1231	0.00975908	-4.53433	0.557843	0.0431551	0.0166866
	32.0518			27.13
L3W 1	33.3994	33.4803	0.114327	30.683	30.6258	0.0808853	-2.85449	0.140046	0.138266	0.0134218
	33.5611			30.5686
L3W 2	34.5726	34.8056	0.329529	29.0278	29.0998	0.101739	-5.70585	0.344877	0.0191588	0.00457992
	35.0386			29.1717
L3W 3	29.925	30.0874	0.22966	25.3614	25.3276	0.0477272	-4.7598	0.234567	0.0369111	0.00600135
	30.2498			25.2939
Pd0 1	31.7113	32.0767	0.516818	27.496	27.5244	0.0402939	-4.55227	0.518386	0.0426216	0.0153147
	32.4422			27.5529
Pd0 2	30.4371	30.6316	0.275052	26.5013	26.4034	0.138509	-4.22828	0.307959	0.0533534	0.0113889
	30.8261			26.3054
Pd0 3	30.9003	30.9765	0.107743	26.0407	25.9988	0.0592409	-4.9777	0.122955	0.0317367	0.0027048
	31.0527			25.9569

## Sheet: Figure 1E
	Sample	Ct	Ct avarege	sd	Ct	Ct avarege	sd	delta Ct	sd	Nro copies	sd
Crp47Eg	L1 EnGal4 > Cantonese 1	25.3791	25.0777	0.426116	22.4966	22.544	0.0670137	-2.53373	0.431353	0.172691	0.0516331
		24.7764			22.5914
	L1 EnGal4 > Cantonese 2	26.0291	25.9916	0.0529188	23.3939	23.3809	0.01843	-2.61074	0.0560363	0.163715	0.00635893
		25.9542			23.3679
	L1 EnGal4 > Cantonese 3	26.2078	26.2412	0.0473325	23.2154	23.3027	0.12347	-2.93853	0.132232	0.130441	0.0119557
		26.2747			23.39
	L1 arrested EnGal4 > Chinmo Rnai 1	30.0607	30.2408	0.25464	26.0852	26.0985	0.0188355	-4.14232	0.255336	0.0566287	0.0100225
		30.4209			26.1118
	L1 arrested EnGal4 > Chinmo Rnai 2	29.0254	29.1356	0.155877	24.0293	24.0923	0.0890403	-5.04327	0.179516	0.0303267	0.00377358
		29.2458			24.1553
	L1 arrested EnGal4 > Chinmo Rnai 3	28.7743	28.7753	0.00137904	23.6863	23.6937	0.0104732	-5.0816	0.0105636	0.0295316	0.000216234
		28.7763			23.7011
Lcp65Ag3	L1 EnGal4 > Cantonese 1	19.1627	19.2463	0.118241	22.4966	22.544	0.0670137	3.29771	0.135911	9.83353	0.926383
		19.3299			22.5914
	L1 EnGal4 > Cantonese 2	19.9403	19.8016	0.196197	23.3939	23.3809	0.01843	3.5793	0.197061	11.953	1.63269
		19.6629			23.3679
	L1 EnGal4 > Cantonese 3	20.2591	20.23	0.0421591	23.2154	23.3027	0.12347	3.07272	0.130469	8.41357	0.760876
		20.1995			23.39
	L1 arrested EnGal4 > Chinmo Rnai 1	24.6156	24.6234	0.0109273	26.0852	26.0985	0.0188355	1.47511	0.0217757	2.78005	0.0419615
		24.6311			26.1118
	L1 arrested EnGal4 > Chinmo Rnai 2	22.6786	22.7778	0.14024	24.0293	24.0923	0.0890403	1.31454	0.166119	2.48723	0.286391
		22.8769			24.1553
	L1 arrested EnGal4 > Chinmo Rnai 3	22.3043	22.3221	0.0252218	23.6863	23.6937	0.0104732	1.37156	0.0273099	2.58751	0.0489808
		22.34			23.7011
CG30457	L1 EnGal4 > Cantonese 1	23.1966	23.1399	0.0802332	22.4966	22.544	0.0670137	-0.59584	0.104538	0.661659	0.047944
		23.0831			22.5914
	L1 EnGal4 > Cantonese 2	24.3176	24.237	0.113961	23.3939	23.3809	0.01843	-0.856145	0.115442	0.552427	0.0442042
		24.1565			23.3679
	L1 EnGal4 > Cantonese 3	23.6243	23.5547	0.098461	23.2154	23.3027	0.12347	-0.251984	0.157922	0.839741	0.0919207
		23.4851			23.39
	L1 arrested EnGal4 > Chinmo Rnai 1	29.1397	29.0904	0.0697219	26.0852	26.0985	0.0188355	-2.99192	0.0722213	0.125702	0.00629264
		29.0411			26.1118
	L1 arrested EnGal4 > Chinmo Rnai 2	27.0183	27.0085	0.0138563	24.0293	24.0923	0.0890403	-2.91622	0.090112	0.132473	0.00827441
		26.9987			24.1553
	L1 arrested EnGal4 > Chinmo Rnai 3	27.9354	27.8301	0.148825	23.6863	23.6937	0.0104732	-4.13646	0.149193	0.0568595	0.00588
		27.7249			23.7011
Edg78E	L1 EnGal4 > Cantonese 1	30.7769	30.6972	0.112753	22.4966	22.544	0.0670137	-8.15314	0.131164	0.00351285	0.000319374
		30.6174			22.5914
	L1 EnGal4 > Cantonese 2	29.9454	30.2118	0.376697	23.3939	23.3809	0.01843	-6.83088	0.377148	0.00878418	0.00229635
		30.4781			23.3679
	L1 EnGal4 > Cantonese 3	30.995	31.0472	0.0738677	23.2154	23.3027	0.12347	-7.74449	0.143879	0.00466311	0.00046505
		31.0994			23.39
	L1 arrested EnGal4 > Chinmo Rnai 1	31.4029	31.1604	0.342977	26.0852	26.0985	0.0188355	-5.06195	0.343493	0.0299366	0.00712765
		30.9179			26.1118
	L1 arrested EnGal4 > Chinmo Rnai 2	29.3627	29.3217	0.0580747	24.0293	24.0923	0.0890403	-5.22936	0.106305	0.0266567	0.00196421
		29.2806			24.1553
	L1 arrested EnGal4 > Chinmo Rnai 3	29.7003	29.6516	0.068764	23.6863	23.6937	0.0104732	-5.95795	0.069557	0.0160871	0.000775612
		29.603			23.7011
Crp47Eg		Mean	stv	sem	t test
	L1 EnGal4 > Cantonese	0.155616	0.022259	0.0128513
	L1 arrested EnGal4 > Chinmo Rnai	0.038829	0.0154201	0.00890281	0.00171652	***
Lcp65Ag3		Mean	stv	sem	t test
	L1 EnGal4 > Cantonese	10.0667	1.78121	1.02838
	L1 arrested EnGal4 > Chinmo Rnai	2.61826	0.148814	0.0859179	0.00195398	***
CG30457		Mean	stv	sem	t test
	L1 EnGal4 > Cantonese	0.684609	0.145025	0.0837303
	L1 arrested EnGal4 > Chinmo Rnai	0.105012	0.0418382	0.0241553	0.00265364	***
Edg78E		Mean	stv	sem	t test
	L1 EnGal4 > Cantonese	0.00565338	0.00277168	0.00160023
	L1 arrested EnGal4 > Chinmo Rnai	0.0242268	0.00723743	0.00417853	0.014249	**
