# Supplementary material for: Antagonistic role of the BTB-zinc finger transcription factors Chinmo and Broad-Complex in the juvenile/pupal transition and in growth control
Source: eLife. 2023 Apr 28;12:e84648. doi: 10.7554/eLife.84648 (PMC10234633; doi:10.7554/eLife.84648)
Supplement: Figure 2—figure supplement 1—source data 1. [file elife-84648-fig2-figsupp1-data1.xlsx]

## Sheet: Sfigure 1D-F
Mean metamere size
trh-Gal4>Cantonese	trh-Gal4>UAS-ChinmoRNAi	trh/Gal4>UAS-ChinmoRNAi;UAS-BrCRNAi
168	58	71
172	62	72
188	51	62
133	48	59
165	78	61
181	43	69
129	65	55
176	53	81
144	42	38
157	39	66
Reative quantification of metamere size
trh-Gal4>Cantonese	trh-Gal4>UAS-ChinmoRNAi	trh/Gal4>UAS-ChinmoRNAi;UAS-BrCRNAi
1.04348	0.360248	0.440994
1.06832	0.385093	0.447205
1.1677	0.31677	0.385093
0.826087	0.298137	0.36646
1.02484	0.484472	0.378882
1.12422	0.267081	0.428571
0.801242	0.403727	0.341615
1.09317	0.329193	0.503106
0.89441	0.26087	0.236025
0.975155	0.242236	0.409938
Welch's ANOVA test
W (DFn, DFd)	107,7 (2,000, 17,32)
P value	<0,0001
P value summary	****
Significant diff. among means (P < 0.05)?	Yes
Data summary
Number of treatments (columns)	3
Number of values (total)	30
Number of families	1
Number of comparisons per family	2
Alpha	0.05
Dunnett's T3 multiple comparisons test	Mean Diff,	95,00% CI of diff,	Below threshold?	Summary	Adjusted P Value	A-?
trh-Gal4 vs. UAS-ChinmoRNAi	0.6671	0,5529 to 0,7812	Yes	****	<0,0001	B	UAS-ChinmoRNAi
trh-Gal4 vs. UAS-ChinmoRNAi;UAS-BrCRNAi	0.6081	0,4941 to 0,7220	Yes	****	<0,0001	C	UAS-ChinmoRNAi;UAS-BrCRNAi
Test details	Mean 1	Mean 2	Mean Diff,	SE of diff,	n1	n2	t	DF
trh-Gal4 vs. UAS-ChinmoRNAi	1.002	0.3348	0.6671	0.04613	10	10	14.46	14.73
trh-Gal4 vs. UAS-ChinmoRNAi;UAS-BrCRNAi	1.002	0.3938	0.6081	0.04571	10	10	13.3	14.42
Mean nuclear size
trh-Gal4>Cantonese	trh-Gal4>UAS-ChinmoRNAi	trh/Gal4>UAS-ChinmoRNAi;UAS-BrCRNAi
409	98	94
512	95	85
356	92	103
300	87	141
452	104	113
433	155	89
621	91	102
378	82	92
356	87	88
477	93	93
Relative quantification of nuclear size
trh-Gal4>Cantonese	trh-Gal4>UAS-ChinmoRNAi	trh/Gal4>UAS-ChinmoRNAi;UAS-BrCRNAi
0.952492	0.228225	0.21891
1.19236	0.221239	0.197951
0.829064	0.214252	0.23987
0.698649	0.202608	0.328365
1.05263	0.242198	0.263158
1.00838	0.360969	0.207266
1.4462	0.211924	0.237541
0.880298	0.190964	0.214252
0.829064	0.202608	0.204937
1.11085	0.216581	0.216581
Welch's ANOVA test
W (DFn, DFd)	60,01 (2,000, 15,96)
P value	<0,0001
P value summary	****
Significant diff. among means (P < 0.05)?	Yes
Data summary
Number of treatments (columns)	3
Number of values (total)	30
Number of families	1
Number of comparisons per family	2
Alpha	0.05
Dunnett's T3 multiple comparisons test	Mean Diff,	95,00% CI of diff,	Below threshold?	Summary	Adjusted P Value	A-?
trh-Gal4 vs. UAS-ChinmoRNAi	0.7708	0,5888 to 0,9529	Yes	****	<0,0001	B	UAS-ChinmoRNAi
trh-Gal4 vs. UAS-ChinmoRNAi;UAS-BrCRNAi	0.7671	0,5866 to 0,9476	Yes	****	<0,0001	C	UAS-ChinmoRNAi;UAS-BrCRNAi
Test details	Mean 1	Mean 2	Mean Diff,	SE of diff,	n1	n2	t	DF
trh-Gal4 vs. UAS-ChinmoRNAi	1	0.2292	0.7708	0.06978	10	10	11.05	9.911
trh-Gal4 vs. UAS-ChinmoRNAi;UAS-BrCRNAi	1	0.2329	0.7671	0.06917	10	10	11.09	9.585
DAPI intensity
trh-Gal4>Cantonese	trh-Gal4>UAS-ChinmoRNAi	trh/Gal4>UAS-ChinmoRNAi;UAS-BrCRNAi
71084	15929	17148
82651	23938	16118
96232	16544	12662
76223	12324	18967
69812	42331	18622
85144	12879	33242
100129	13255	24221
92882	14311	12344
88542	12972	17655
87223	15223	18231
Relative quantification of DAPI intensity
trh-Gal4>Cantonese	trh-Gal4>UAS-ChinmoRNAi	trh/Gal4>UAS-ChinmoRNAi;UAS-BrCRNAi
0.836361	0.187418	0.20176
0.972456	0.28165	0.189641
1.13225	0.194654	0.148979
0.896826	0.145002	0.223162
0.821395	0.498059	0.219103
1.00179	0.151532	0.391119
1.1781	0.155956	0.28498
1.09283	0.168381	0.145237
1.04177	0.152626	0.207725
1.02625	0.179111	0.214503
Welch's ANOVA test
W (DFn, DFd)	162,8 (2,000, 16,99)
P value	<0,0001
P value summary	****
Significant diff. among means (P < 0.05)?	Yes
Data summary
Number of treatments (columns)	3
Number of values (total)	30
Number of families	1
Number of comparisons per family	2
Alpha	0.05
Dunnett's T3 multiple comparisons test	Mean Diff,	95,00% CI of diff,	Below threshold?	Summary	Adjusted P Value	A-?
trh-Gal4 vs. UAS-ChinmoRNAi	0.7886	0,6641 to 0,9130	Yes	****	<0,0001	B	UAS-ChinmoRNAi
trh-Gal4 vs. UAS-ChinmoRNAi;UAS-BrCRNAi	0.7774	0,6680 to 0,8868	Yes	****	<0,0001	C	UAS-ChinmoRNAi;UAS-BrCRNAi
Test details	Mean 1	Mean 2	Mean Diff,	SE of diff,	n1	n2	t	DF
trh-Gal4 vs. UAS-ChinmoRNAi	1	0.2114	0.7886	0.05118	10	10	15.41	17.8
trh-Gal4 vs. UAS-ChinmoRNAi;UAS-BrCRNAi	1	0.2226	0.7774	0.0442	10	10	17.59	14.6
