# Supplementary material for: Antagonistic role of the BTB-zinc finger transcription factors Chinmo and Broad-Complex in the juvenile/pupal transition and in growth control
Source: eLife. 2023 Apr 28;12:e84648. doi: 10.7554/eLife.84648 (PMC10234633; doi:10.7554/eLife.84648)
Supplement: Figure 2—source data 1. [file elife-84648-fig2-data1.xlsx]

## Sheet: Figure 2 B C D
SG size		Dapi inyensity		Nuclear size
FkhGal4>Cantonese	FkhGal4>UAS Chinmo RNAi	FkhGal4>Cantonese	FkhGal4>UAS Chinmo RNAi	FkhGal4>Cantonese	FkhGal4>UAS Chinmo RNAi
132629	24934	41962	9614	568218	76755
168738	27017.9	32074	9984	726311	75037
241367	28993.5	35054	8687	423872	79619
228415	29755.8	18102	10641	336234	95085
232662	25427.8	16326	11591	456522	123152
156228	23691	29633	9372	622061	107114
128797	19899.7	21665	4531	555617	44106
221372	24734.7	25466	2827	514948	50979
243254	28654.3	18966	8031	454804	96803
238761	23451.4	44653	6485	562490	76755
		49607	5779	792756	93367
		59195	6562	638673	112842
		41514	6682	402679	94512
		41642	3874	528695	72173
		39478	5411	462823	89357
		58322	3846	609460	71600
		23234	3814	416999	71.027
		33591	6979	612897	956.58
		23990		460532
		20916		424445
		20803		423872
		16749		337380
		15673		410698
		34424		599722
		32836		548743
		30474		501201
		30236		525831
		32685		554471
		33113		504637
		35672		515521
		31866		430173
		29251		470842
		27251		495473
		23250		403824
		76773		589412
		47639		517239
		40424		399815
		42549		395232
		42027		419863
		41046		374039
		42977		356855
		38006		395232
		31353		337380
		32866		335088
		34374		342535
		36033		342535
		33060		406688
		32549		428455
		41313		486308
		37571		353991
		30559		395805
		38800		394660
199222	25656	34415.2	6928.33	472395	75571.3	Average
47036.1	3019.77	11459	2628.67	103414	33654.2	sd
8.17071e-10	***	4.62764e-15	***	1.23667e-24	***	t test

## Sheet: Figure 2 E
		BrC			rpl32
	Sample	Ct	Ct average	sd	Ct	Ct average	sd	delta Ct	sd	Nro copies	sd		Mean	sd	t test
	FkhGal4 > Cantonese 1	33.3562	33.14	0.301764	27.9109	27.97	0.082	-5.17	0.312706	0.0277763	0.00602056	FkhGal4 > Cantonese	0.0380202	0.0162191	0.617058
		32.9294			28.0272
	FkhGal4 > Cantonese 2	31.4116	31.28	0.184	25.9606	26.2	0.345	-5.08	0.391	0.0295643	0.00801253	FkhGal4 > ChinmoRNAi	0.0571721	0.0591005
		31.1511			26.4479
	FkhGal4 > Cantonese 3	30.3094	30.4	0.126	26.0114	26.26	0.346	-4.14	0.368228	0.0567199	0.014477
		30.4875			26.5014
	FkhGal4 > ChinmoRNAi 1	35.6878	35.74	0.076	33.1246	32.74	0.539	-3	0.544332	0.125	0.0471627
		35.7946			32.3617
	FkhGal4 > ChinmoRNAi 2	33.3013	32.25	0.747	27.0937	27.18	0.121	-5.07	0.756736	0.0297699	0.0156152
		32.2451			27.265
	FkhGal4 > ChinmoRNAi 3	37.4407	35.18	1.598	29.2763	29.28	0.001	-5.9	1.598	0.0167465	0.0185492
		35.1811			29.2754
		sgs 1			rpl32
	Sample	Ct	Ct average	sd	Ct	Ct average	sd	delta Ct	sd	Nro copies	sd		Mean	sd	t test
	FkhGal4 > Cantonese 1	25.42	25.44	0.023	27.9109	27.97	0.082	2.53	0.0851645	5.77572	0.34095	FkhGal4 > Cantonese	3.42937	2.87289	0.00986838
		25.4518			28.0272										***
	FkhGal4 > Cantonese 2	28.3738	28.35	0.04	25.9606	26.2	0.345	-2.15	0.347311	0.225313	0.0542412	FkhGal4 > ChinmoRNAi	0.529655	0.710766
		28.3172			26.4479
	FkhGal4 > Cantonese 3	24.1106	24.16	0.064	26.0114	26.26	0.346	2.1	0.351869	4.28709	1.04561
		24.2015			26.5014
	FkhGal4 > ChinmoRNAi 1	32.2121	32.31	0.133	33.1246	32.74	0.539	0.43	0.555167	1.34723	0.518432
		32.3997			32.3617
	FkhGal4 > ChinmoRNAi 2	31.3023	31.27	0.039	27.0937	27.18	0.121	-4.09	0.12713	0.0587202	0.0051744
		31.2464			27.265
	FkhGal4 > ChinmoRNAi 3	31.9111	31.73	0.258	29.2763	29.28	0.001	-2.45	0.258002	0.183011	0.0327284
		31.5463			29.2754
		sgs 3			rpl32
	Sample	Ct	Ct average	sd	Ct	Ct average	sd	delta Ct	sd	Nro copies	sd		Mean	sd	t test
	FkhGal4 > Cantonese 1	17.6168	17.6	0.022	27.9109	27.97	0.082	10.37	0.0848999	1323.37	77.8778	FkhGal4 > Cantonese	842.024	555.662	0.00347288
		17.5864			28.0272										***
	FkhGal4 > Cantonese 2	18.3427	18.33	0.018	25.9606	26.2	0.345	7.87	0.345469	233.941	56.0197	FkhGal4 > ChinmoRNAi	19.3905	22.9506
		18.3175			26.4479
	FkhGal4 > Cantonese 3	16.3736	16.34	0.047	26.0114	26.26	0.346	9.92	0.349178	968.763	234.471
		16.3074			26.5014
	FkhGal4 > ChinmoRNAi 1	27.2329	27.22	0.019	33.1246	32.74	0.539	5.52	0.539335	45.8866	17.1542
		27.2059			32.3617
	FkhGal4 > ChinmoRNAi 2	24.6427	24.67	0.033	27.0937	27.18	0.121	2.51	0.125419	5.6962	0.495194
		24.6892			27.265
	FkhGal4 > ChinmoRNAi 3	26.6192	26.56	0.077	29.2763	29.28	0.001	2.72	0.0770065	6.58873	0.351685
		26.5107			29.2754
		Sgs 4			rpl32
	Sample	Ct	Ct average	sd	Ct	Ct average	sd	delta Ct	sd	Nro copies	sd		Mean	sd	t test
	FkhGal4 > Cantonese 1	22.8007	22.62	0.262	27.9109	27.97	0.082	5.35	0.274532	40.7859	7.76121	FkhGal4 > Cantonese	44.2725	8.01999	0.00805674
		22.4299			28.0272										***
	FkhGal4 > Cantonese 2	21.0042	20.93	0.1	25.9606	26.2	0.345	5.27	0.359201	38.5859	9.60706	FkhGal4 > ChinmoRNAi	5.22394	6.27389
		20.8624			26.4479
	FkhGal4 > Cantonese 3	20.4708	20.52	0.067	26.0114	26.26	0.346	5.74	0.352427	53.4456	13.0559
		20.5652			26.5014
	FkhGal4 > ChinmoRNAi 1	29.095	29.1	0.01	33.1246	32.74	0.539	3.64	0.539093	12.4666	4.65841
		29.1096			32.3617
	FkhGal4 > ChinmoRNAi 2	26.2897	26.38	0.127	27.0937	27.18	0.121	0.8	0.175414	1.7411	0.211696
		26.4687			27.265
	FkhGal4 > ChinmoRNAi 3	28.7618	28.73	0.039	29.2763	29.28	0.001	0.55	0.0390128	1.46409	0.0395913
		28.7066			29.2754
		Sgs 7			rpl32
	Sample	Ct	Ct average	sd	Ct	Ct average	sd	delta Ct	sd	Nro copies	sd		Mean	sd	t test
	FkhGal4 > Cantonese 1	21.1001	21.1	0.006	27.9109	27.97	0.082	6.87	0.0822192	116.97	6.66615	FkhGal4 > Cantonese	127.897	97.8179	0.0282177
		21.1088			28.0272										*
	FkhGal4 > Cantonese 2	21.042	21.03	0.024	25.9606	26.2	0.345	5.17	0.345834	36.0019	8.63014	FkhGal4 > ChinmoRNAi	4.23577	4.47734
		21.008			26.4479
	FkhGal4 > Cantonese 3	18.4106	18.41	0	26.0114	26.26	0.346	7.85	0.346	230.72	55.3334
		18.4103			26.5014
	FkhGal4 > ChinmoRNAi 1	29.5093	29.51	0.003	33.1246	32.74	0.539	3.23	0.539008	9.38268	3.50548
		29.5142			32.3617
	FkhGal4 > ChinmoRNAi 2	26.0682	26.12	0.074	27.0937	27.18	0.121	1.06	0.141834	2.08493	0.204974
		26.1723			27.265
	FkhGal4 > ChinmoRNAi 3	28.91	28.97	0.093	29.2763	29.28	0.001	0.31	0.0930054	1.23971	0.0799195
		29.0394			29.2754
		sgs 8			rpl32
	Sample	Ct	Ct average	sd	Ct	Ct average	sd	delta Ct	sd	Nro copies	sd		Mean	sd	t test
	FkhGal4 > Cantonese 1	22.2922	22.26	0.047	27.9109	27.97	0.082	5.71	0.0945145	52.3457	3.4293	FkhGal4 > Cantonese	40.5746	19.7673	0.000194113
		22.2261			28.0272										***
	FkhGal4 > Cantonese 2	22.0427	22.05	0.009	25.9606	26.2	0.345	4.15	0.345117	17.7531	4.24685	FkhGal4 > ChinmoRNAi	2.41776	2.94328
		22.0559			26.4479
	FkhGal4 > Cantonese 3	20.8763	20.57	0.436	26.0114	26.26	0.346	5.69	0.556608	51.6251	19.9175
		20.2596			26.5014
	FkhGal4 > ChinmoRNAi 1	30.0652	30.2	0.194	33.1246	32.74	0.539	2.54	0.57285	5.81589	2.30931
		30.3395			32.3617
	FkhGal4 > ChinmoRNAi 2	28.0241	27.76	0.379	27.0937	27.18	0.121	-0.58	0.397847	0.668964	0.184478
		27.4877			27.265
	FkhGal4 > ChinmoRNAi 3	29.8375	29.66	0.254	29.2763	29.28	0.001	-0.38	0.254002	0.768438	0.135292
		29.4781			29.2754
		Rpl32	ng1					ng1
	Replicate #	Ct Mean	Ct Mean	delta Ct	2^deltaCt			2^deltaCt			average	SEM
	control1	30.61	29.01	-1.6	3.03143		control	3.03143	0.632878	4.62675	2.76369	1.16068
	control2	32.37	33.03	0.66	0.632878		fkhgal4-chinmoRNAi	0.112267	0.0100965	0.0354026	0.0525886	0.0307202
	control3	31.285	29.075	-2.21	4.62675		fkhgal4-chinmoRNAi-BrCRNAi	0.420448	0.0128686	0.00650155	0.146606	0.136933
	fkhgal4-chinmoRNAi 1	32.96	36.115	3.155	0.112267
	fkhgal4-chinmoRNAi 2	29.39	36.02	6.63	0.0100965			2^deltaCt			average	SEM
	fkhgal4-chinmoRNAi 3	32.015	36.835	4.82	0.0354026		control				1
	fkhgal4-chinmoRNAi-BrCRNAi 1	37.71	38.96	1.25	0.420448		fkhgal4-chinmoRNAi	0.040622	0.00365327	0.0128099	0.0190284	0.0111157
	fkhgal4-chinmoRNAi-BrCRNAi 2	29.765	36.045	6.28	0.0128686		fkhgal4-chinmoRNAi-BrCRNAi	0.152133	0.00465632	0.00235249	0.0530473	0.0495473
	fkhgal4-chinmoRNAi-BrCRNAi 3	28.97	36.235	7.265	0.00650155
		Rpl32	ng2					ng2
	Replicate #	Ct Mean	Ct Mean	delta Ct	2^deltaCt			2^deltaCt			average	SEM
	control1	30.61	27.04	-3.57	11.8762		control	11.8762	1.91853	9.71356	7.83609	3.02393
	control2	32.37	31.43	-0.94	1.91853		fkhgal4-chinmoRNAi	0.0730486	0.00326206	0.0107837	0.0290315	0.0221154
	control3	31.285	28.005	-3.28	9.71356		fkhgal4-chinmoRNAi-BrCRNAi	1.32409	0.00152709	0.00364466	0.443087	0.440501
	fkhgal4-chinmoRNAi 1	32.96	36.735	3.775	0.0730486
	fkhgal4-chinmoRNAi 2	29.39	37.65	8.26	0.00326206			2^deltaCt			average	SEM
	fkhgal4-chinmoRNAi 3	32.015	38.55	6.535	0.0107837		control				1
	fkhgal4-chinmoRNAi-BrCRNAi 1	37.71	37.305	-0.405	1.32409		fkhgal4-chinmoRNAi	0.00932207	0.000416287	0.00137616	0.00370484	0.00282225
	fkhgal4-chinmoRNAi-BrCRNAi 2	29.765	39.12	9.355	0.00152709		fkhgal4-chinmoRNAi-BrCRNAi	0.168973	0.000194879	0.000465112	0.0565444	0.0562144
	fkhgal4-chinmoRNAi-BrCRNAi 3	28.97	37.07	8.1	0.00364466
		Rpl32	ng3					ng3
	Replicate #	Ct Mean	Ct Mean	delta Ct	2^deltaCt			2^deltaCt			average	SEM
	control1	23.135	24.83	1.695	0.308855		control	0.308855	0.213159	0.363493	0.295169	0.043934
	control2	21.22	23.45	2.23	0.213159		fkhgal4-chinmoRNAi	0.00336541	0.00115732	0.00198727	0.00217	0.000643938
	control3	22.65	24.11	1.46	0.363493		fkhgal4-chinmoRNAi-BrCRNAi	0.0196408	0.00445611	0.00728932	0.0104621	0.00466168
	fkhgal4-chinmoRNAi 1	26.17	34.385	8.215	0.00336541
	fkhgal4-chinmoRNAi 2	23.45	33.205	9.755	0.00115732			2^deltaCt			average	SEM
	fkhgal4-chinmoRNAi 3	25.265	34.24	8.975	0.00198727		control				1
	fkhgal4-chinmoRNAi-BrCRNAi 1	28.695	34.365	5.67	0.0196408		fkhgal4-chinmoRNAi	0.0114017	0.00392086	0.00673264	0.00735172	0.00218159
	fkhgal4-chinmoRNAi-BrCRNAi 2	25.125	32.935	7.81	0.00445611		fkhgal4-chinmoRNAi-BrCRNAi	0.066541	0.0150968	0.0246954	0.0354444	0.0157933
	fkhgal4-chinmoRNAi-BrCRNAi 3	25.56	32.66	7.1	0.00728932
