# Supplementary material for: Antagonistic role of the BTB-zinc finger transcription factors Chinmo and Broad-Complex in the juvenile/pupal transition and in growth control
Source: eLife. 2023 Apr 28;12:e84648. doi: 10.7554/eLife.84648 (PMC10234633; doi:10.7554/eLife.84648)
Supplement: Figure 5—source data 1. [file elife-84648-fig5-data1.xlsx]

## Sheet: Figure 5 B C D
SG size		Dapi intensity		Nuclear size
FkhGal4>Cantonese	FkhGal4>UAS Chinmo RNAi; UAS BrC RNAI	FkhGal4>Cantonese	FkhGal4>UAS Chinmo RNAi; UAS BrC RNAI	FkhGal4>Cantonese	FkhGal4>UAS Chinmo RNAi; UAS BrC RNAI
132629	18918.5	41962	9551	568218	76755
168738	22080.3	32074	7914	726311	54989
241367	17647.4	35054	4041	423872	37805
228415	22913.7	18102	3432	336234	27494
232662	19404.8	16326	3183	456522	28640
156228	39446.5	29633	10461	622061	76755
128797	18946.5	21665	10412	555617	58426
221372	18946.5	25466	7514	514948	85920
243254	18017.4	18966	5454	454804	45251
238761	18475.7	44653	7082	562490	66445
		49607	7167	792756	79046
		59195	4267	638673	46970
		41514	3955	402679	41814
		41642	2874	528695	38950
		39478	4793	462823	53270
		58322	5921	609460	79619
		23234	8196	416999	96231
		33591	6007	612897	73891
		23990	2991	460532	43533
		20916	5592	424445	86493
		20803	4084	423872	72173
		16749	5227	337380	84202
		15673	3664	410698	52125
		34424	8722	599722	88784
		32836	8903	548743	128880
		30474	13662	501201	131744
		30236	8902	525831	106541
		32685	5786	554471	103104
		33113	7984	504637	92794
		35672	12337	515521	117997
		31866	12473	430173	197616
		29251	11117	470842	159239
		27251	8394	495473	135754
		23250	11313	403824	112842
		76773	9238	589412	94512
		47639	7988	517239	85920
		40424	9424	399815	158666
		42549	9425	395232	131171
		42027	14749	419863	146064
		41046	9283	374039	101959
		42977	8332	356855	89930
		38006	10098	395232	106541
		31353	7684	337380	123152
		32866	9175	335088	107114
		34374	8595	342535	87638
		36033	8669	342535	107687
		33060	8373	406688	101959
		32549	11579	428455	172413
		41313	8982	486308	95085
		37571	8362	353991	107114
		30559	8449	395805	123725
		38800	10186	394660	97949
199222	21479.7	34415.2	7922.42	472395	92705.6	Average
47036.1	6537.24	11459	2825.85	103414	37424.4	sd
6.2959e-10	***	6.13673e-30	***	3.87451e-45	***	t test

## Sheet: Figure 5 E-F
		sgs 1			rpl32
	Sample	Ct	Ct average	sd	Ct	Ct average	sd	delta Ct	sd	Nro copies	sd		Mean	sd	t test
	FkhGal4 > Cantonese 1	25.42	25.44	0.023	27.9109	27.97	0.082	2.53	0.0851645	5.77572	0.34095	FkhGal4 > Cantonese	3.42937	2.87289	0.00363197
		25.4518			28.0272										***
	FkhGal4 > Cantonese 2	28.3738	28.35	0.04	25.9606	26.2	0.345	-2.15	0.347311	0.225313	0.0542412	FkhGal4 > Br-C RNAi +ChinmoRNAi	0.31882	0.0854946
		28.3172			26.4479
	FkhGal4 > Cantonese 3	24.1106	24.16	0.064	26.0114	26.26	0.346	2.1	0.351869	4.28709	1.04561
		24.2015			26.5014
	FkhGal4 > Br-C RNAi +ChinmoRNAi 1	34.2571	34.2	0.083	32.4383	32.9347	0.0101998	-1.26529	0.0836244	0.416016	0.0241139
		34.1394			32.4311
	FkhGal4 > Br-C RNAi +ChinmoRNAi 2	32.2965	32.51	0.306	30.9842	30.7	0.401158	-1.81	0.504543	0.285191	0.0997377
		32.729			30.4169
	FkhGal4 > Br-C RNAi +ChinmoRNAi 3	31.7485	31.64	0.15	29.5467	29.67	0.173268	-1.97	0.229176	0.255253	0.0405477
		31.5367			29.7917
		sgs 3			rpl32
	Sample	Ct	Ct average	sd	Ct	Ct average	sd	delta Ct	sd	Nro copies	sd		Mean	sd	t test
	FkhGal4 > Cantonese 1	17.6168	17.6	0.022	27.9109	27.97	0.082	10.37	0.0848999	1323.37	77.8778	FkhGal4 > Cantonese	842.024	555.662	0.000472879
		17.5864			28.0272										***
	FkhGal4 > Cantonese 2	18.3427	18.33	0.018	25.9606	26.2	0.345	7.87	0.345469	233.941	56.0197	FkhGal4 > Br-C RNAi +ChinmoRNAi	0.00260071	0.0038787
		18.3175			26.4479
	FkhGal4 > Cantonese 3	16.3736	16.34	0.047	26.0114	26.26	0.346	9.92	0.349178	968.763	234.471
		16.3074			26.5014
	FkhGal4 > Br-C RNAi +ChinmoRNAi 1	40.276	40.08	0.271	32.4383	32.9347	0.0101998	-7.14529	0.271192	0.00706404	0.00132787
		39.8926			32.4311
	FkhGal4 > Br-C RNAi +ChinmoRNAi 2	38.2934	41.2	4.111	30.9842	30.7	0.401158	-10.5	4.13053	0.000690534	0.00197704
		44.1069			30.4169
	FkhGal4 > Br-C RNAi +ChinmoRNAi 3	45.3075	44.03	1.803	29.5467	29.67	0.173268	-14.36	1.81131	4.75564e-05	5.97072e-05
		42.7577			29.7917
		Sgs 4			rpl32
	Sample	Ct	Ct average	sd	Ct	Ct average	sd	delta Ct	sd	Nro copies	sd		Mean	sd	t test
	FkhGal4 > Cantonese 1	22.8007	22.62	0.262	27.9109	27.97	0.082	5.35	0.274532	40.7859	7.76121	FkhGal4 > Cantonese	44.2725	8.01999	0.00805674
		22.4299			28.0272										***
	FkhGal4 > Cantonese 2	21.0042	20.93	0.1	25.9606	26.2	0.345	5.27	0.359201	38.5859	9.60706	FkhGal4 > Br-C RNAi +ChinmoRNAi	1.31681	1.92128
		20.8624			26.4479
	FkhGal4 > Cantonese 3	20.4708	20.52	0.067	26.0114	26.26	0.346	5.74	0.352427	53.4456	13.0559
		20.5652			26.5014
	FkhGal4 > Br-C RNAi +ChinmoRNAi 1	35.4479	36.45	1.415	32.4383	32.9347	0.0101998	-3.51529	1.41504	0.0874565	0.0857799
		37.45			32.4311
	FkhGal4 > Br-C RNAi +ChinmoRNAi 2	28.9611	28.88	0.108	30.9842	30.7	0.401158	1.82	0.415441	3.53081	1.01674
		28.8083			30.4169
	FkhGal4 > Br-C RNAi +ChinmoRNAi 3	31.5097	31.26	0.358	29.5467	29.67	0.173268	-1.59	0.397726	0.332171	0.0915739
		31			29.7917
		Sgs 7			rpl32
	Sample	Ct	Ct average	sd	Ct	Ct average	sd	delta Ct	sd	Nro copies	sd		Mean	sd	t test
	FkhGal4 > Cantonese 1	21.1001	21.1	0.006	27.9109	27.97	0.082	6.87	0.0822192	116.97	6.66615	FkhGal4 > Cantonese	127.897	97.8179	0.00023
		21.1088			28.0272										***
	FkhGal4 > Cantonese 2	21.042	21.03	0.024	25.9606	26.2	0.345	5.17	0.345834	36.0019	8.63014	FkhGal4 > Br-C RNAi +ChinmoRNAi	0.00248017	0.00271467
		21.008			26.4479
	FkhGal4 > Cantonese 3	18.4106	18.41	0	26.0114	26.26	0.346	7.85	0.346	230.72	55.3334
		18.4103			26.5014
	FkhGal4 > Br-C RNAi +ChinmoRNAi 1	NA	NA	NA	32.4383	32.9347	0.0101998	-	#VALUE!	#VALUE!	#VALUE!
		NA			32.4311
	FkhGal4 > Br-C RNAi +ChinmoRNAi 2	38.5284	38.5284	0.009	30.9842	30.7	0.401158	-7.82837	0.401259	0.00439974	0.0012237
		38.51			30.4169
	FkhGal4 > Br-C RNAi +ChinmoRNAi 3	40.4707	40.4707	0.009	29.5467	29.67	0.173268	-10.8007	0.173502	0.000560612	6.74204e-05
		40.48			29.7917
		sgs 8			rpl32
	Sample	Ct	Ct average	sd	Ct	Ct average	sd	delta Ct	sd	Nro copies	sd		Mean	sd	t test
	FkhGal4 > Cantonese 1	22.2922	22.26	0.047	27.9109	27.97	0.082	5.71	0.0945145	52.3457	3.4293	FkhGal4 > Cantonese	40.5746	19.7673	0.0241441
		22.2261			28.0272										**
	FkhGal4 > Cantonese 2	22.0427	22.05	0.009	25.9606	26.2	0.345	4.15	0.345117	17.7531	4.24685	FkhGal4 > Br-C RNAi +ChinmoRNAi	0.242578	0.031349
		22.0559			26.4479
	FkhGal4 > Cantonese 3	20.8763	20.57	0.436	26.0114	26.26	0.346	5.69	0.556608	51.6251	19.9175
		20.2596			26.5014
	FkhGal4 > Br-C RNAi +ChinmoRNAi 1	34.3569	34.82	0.656	32.4383	32.9347	0.0101998	-1.88529	0.656079	0.270689	0.123099
		35.2841			32.4311
	FkhGal4 > Br-C RNAi +ChinmoRNAi 2	32.8764	32.96	0.125	30.9842	30.7	0.401158	-2.26	0.420182	0.208772	0.0608044
		33.0536			30.4169
	FkhGal4 > Br-C RNAi +ChinmoRNAi 3	31.2739	31.68	0.573	29.5467	29.67	0.173268	-2.01	0.598624	0.248273	0.103017
		32.08			29.7917
				Rpl32	ng1					ng1
			Replicate #	Ct Mean	Ct Mean	delta Ct	2^deltaCt			2^deltaCt			average	SEM
			control1	30.61	29.01	-1.6	3.03143		control	3.03143	0.632878	4.62675	2.76369	1.16068
			control2	32.37	33.03	0.66	0.632878		fkhgal4-chinmoRNAi	0.112267	0.0100965	0.0354026	0.0525886	0.0307202
			control3	31.285	29.075	-2.21	4.62675		fkhgal4-chinmoRNAi-BrCRNAi	0.420448	0.0128686	0.00650155	0.146606	0.136933
			fkhgal4-chinmoRNAi 1	32.96	36.115	3.155	0.112267
			fkhgal4-chinmoRNAi 2	29.39	36.02	6.63	0.0100965			2^deltaCt			average	SEM
			fkhgal4-chinmoRNAi 3	32.015	36.835	4.82	0.0354026		control				1
			fkhgal4-chinmoRNAi-BrCRNAi 1	37.71	38.96	1.25	0.420448		fkhgal4-chinmoRNAi	0.040622	0.00365327	0.0128099	0.0190284	0.0111157
			fkhgal4-chinmoRNAi-BrCRNAi 2	29.765	36.045	6.28	0.0128686		fkhgal4-chinmoRNAi-BrCRNAi	0.152133	0.00465632	0.00235249	0.0530473	0.0495473
			fkhgal4-chinmoRNAi-BrCRNAi 3	28.97	36.235	7.265	0.00650155
				Rpl32	ng2					ng2
			Replicate #	Ct Mean	Ct Mean	delta Ct	2^deltaCt			2^deltaCt			average	SEM
			control1	30.61	27.04	-3.57	11.8762		control	11.8762	1.91853	9.71356	7.83609	3.02393
			control2	32.37	31.43	-0.94	1.91853		fkhgal4-chinmoRNAi	0.0730486	0.00326206	0.0107837	0.0290315	0.0221154
			control3	31.285	28.005	-3.28	9.71356		fkhgal4-chinmoRNAi-BrCRNAi	1.32409	0.00152709	0.00364466	0.443087	0.440501
			fkhgal4-chinmoRNAi 1	32.96	36.735	3.775	0.0730486
			fkhgal4-chinmoRNAi 2	29.39	37.65	8.26	0.00326206			2^deltaCt			average	SEM
			fkhgal4-chinmoRNAi 3	32.015	38.55	6.535	0.0107837		control				1
			fkhgal4-chinmoRNAi-BrCRNAi 1	37.71	37.305	-0.405	1.32409		fkhgal4-chinmoRNAi	0.00932207	0.000416287	0.00137616	0.00370484	0.00282225
			fkhgal4-chinmoRNAi-BrCRNAi 2	29.765	39.12	9.355	0.00152709		fkhgal4-chinmoRNAi-BrCRNAi	0.168973	0.000194879	0.000465112	0.0565444	0.0562144
			fkhgal4-chinmoRNAi-BrCRNAi 3	28.97	37.07	8.1	0.00364466
				Rpl32	ng3					ng3
			Replicate #	Ct Mean	Ct Mean	delta Ct	2^deltaCt			2^deltaCt			average	SEM
			control1	23.135	24.83	1.695	0.308855		control	0.308855	0.213159	0.363493	0.295169	0.043934
			control2	21.22	23.45	2.23	0.213159		fkhgal4-chinmoRNAi	0.00336541	0.00115732	0.00198727	0.00217	0.000643938
			control3	22.65	24.11	1.46	0.363493		fkhgal4-chinmoRNAi-BrCRNAi	0.0196408	0.00445611	0.00728932	0.0104621	0.00466168
			fkhgal4-chinmoRNAi 1	26.17	34.385	8.215	0.00336541
			fkhgal4-chinmoRNAi 2	23.45	33.205	9.755	0.00115732			2^deltaCt			average	SEM
			fkhgal4-chinmoRNAi 3	25.265	34.24	8.975	0.00198727		control				1
			fkhgal4-chinmoRNAi-BrCRNAi 1	28.695	34.365	5.67	0.0196408		fkhgal4-chinmoRNAi	0.0114017	0.00392086	0.00673264	0.00735172	0.00218159
			fkhgal4-chinmoRNAi-BrCRNAi 2	25.125	32.935	7.81	0.00445611		fkhgal4-chinmoRNAi-BrCRNAi	0.066541	0.0150968	0.0246954	0.0354444	0.0157933
			fkhgal4-chinmoRNAi-BrCRNAi 3	25.56	32.66	7.1	0.00728932
