# Supplementary material for: Antagonistic role of the BTB-zinc finger transcription factors Chinmo and Broad-Complex in the juvenile/pupal transition and in growth control
Source: eLife. 2023 Apr 28;12:e84648. doi: 10.7554/eLife.84648 (PMC10234633; doi:10.7554/eLife.84648)
Supplement: Figure 8—source data 1. [file elife-84648-fig8-data1.xlsx]

## Sheet: Figure 8
Normalised pouch volumes
Individuals#	Control	lglRNAi	lglRNAi; BrCRNAi	lglRNAi; UAS-BrC	lglRNAi; UAS-E93	lglRNAi; UAS-E93; UAS-p35
1	1.0571	1.8371	1.9771	0.7771	0.3771	0.5371
2	0.9871	1.2771	2.1671	0.6771	0.5171	0.8371
3	1.1671	1.7271	2.3971	0.4971	0.6571	0.5971
4	0.7771	1.8171	1.8771	0.8371	0.4371	0.7271
5	0.9371	1.5071	1.8271	0.9471	0.6071	0.8671
6	1.0971
7	0.9771
ANOVA Results			Multiple comparisons Control vs Experimental groups
Brown-Forsythe ANOVA test			Dunnett's T3 multiple comparisons test	Mean Diff,	95,00% CI of diff,	Below threshold?	Summary	Adjusted P Value	A-?
F* (DFn, DFd)	56,59 (5,000, 18,37)		Control vs. lglRNAi	-0.6331	-1,046 to -0,2201	Yes	**	0.007	B	lglRNAi
P value	<0,0001		Control vs. lglRNAi; BrCRNAi	-1.049	-1,456 to -0,6421	Yes	***	0.0004	C	lglRNAi; BrCRNAi
P value summary	****		Control vs. lglRNAi; UAS-BrC	0.2529	-0,05059 to 0,5563	No	ns	0.1059	D	lglRNAi; UAS-BrC
Significant diff. among means (P < 0.05)?	Yes		Control vs. lglRNAi; UAS-E93	0.4809	0,2579 to 0,7038	Yes	***	0.0004	E	lglRNAi; UAS-E93
			Control vs. lglRNAi; UAS-E93; UAS-p35	0.2869	0,02525 to 0,5485	Yes	*	0.0319	F	lglRNAi; UAS-E93; UAS-p35
Welch's ANOVA test
W (DFn, DFd)	38,75 (5,000, 11,48)		Test details	Mean 1	Mean 2	Mean Diff,	SE of diff,	n1	n2	t	DF
P value	<0,0001		Control vs. lglRNAi	1	1.633	-0.6331	0.1166	7	5	5.428	5.604
P value summary	****		Control vs. lglRNAi; BrCRNAi	1	2.049	-1.049	0.115	7	5	9.127	5.661
Significant diff. among means (P < 0.05)?	Yes		Control vs. lglRNAi; UAS-BrC	1	0.7471	0.2529	0.08989	7	5	2.813	7.006
			Control vs. lglRNAi; UAS-E93	1	0.5191	0.4809	0.07032	7	5	6.838	9.217
Data summary			Control vs. lglRNAi; UAS-E93; UAS-p35	1	0.7131	0.2869	0.08029	7	5	3.573	7.943
Number of treatments (columns)	6
Number of values (total)	32
Multiple comparisons all groups
Dunnett's T3 multiple comparisons test	Mean Diff,	95,00% CI of diff,	Below threshold?	Summary	Adjusted P Value
Control vs. lglRNAi	-0.6331	-1,132 to -0,1345	Yes	*	0.0163
Control vs. lglRNAi; BrCRNAi	-1.049	-1,541 to -0,5577	Yes	**	0.001
Control vs. lglRNAi; UAS-BrC	0.2529	-0,1113 to 0,6170	No	ns	0.2267
Control vs. lglRNAi; UAS-E93	0.4809	0,2157 to 0,7460	Yes	***	0.001
Control vs. lglRNAi; UAS-E93; UAS-p35	0.2869	-0,02553 to 0,5992	No	ns	0.0764
lglRNAi vs. lglRNAi; BrCRNAi	-0.416	-0,9970 to 0,1650	No	ns	0.2189
lglRNAi vs. lglRNAi; UAS-BrC	0.886	0,3552 to 1,417	Yes	**	0.003
lglRNAi vs. lglRNAi; UAS-E93	1.114	0,6076 to 1,620	Yes	***	0.0009
lglRNAi vs. lglRNAi; UAS-E93; UAS-p35	0.92	0,4151 to 1,425	Yes	**	0.0017
lglRNAi; BrCRNAi vs. lglRNAi; UAS-BrC	1.302	0,7773 to 1,827	Yes	***	0.0002
lglRNAi; BrCRNAi vs. lglRNAi; UAS-E93	1.53	1,031 to 2,029	Yes	***	0.0001
lglRNAi; BrCRNAi vs. lglRNAi; UAS-E93; UAS-p35	1.336	0,8375 to 1,834	Yes	***	0.0001
lglRNAi; UAS-BrC vs. lglRNAi; UAS-E93	0.228	-0,1456 to 0,6016	No	ns	0.3399
lglRNAi; UAS-BrC vs. lglRNAi; UAS-E93; UAS-p35	0.034	-0,3552 to 0,4232	No	ns	>0,9999
lglRNAi; UAS-E93 vs. lglRNAi; UAS-E93; UAS-p35	-0.194	-0,5165 to 0,1285	No	ns	0.3833
Test details	Mean 1	Mean 2	Mean Diff,	SE of diff,	n1	n2	t	DF
Control vs. lglRNAi	1	1.633	-0.6331	0.1166	7	5	5.428	5.604
Control vs. lglRNAi; BrCRNAi	1	2.049	-1.049	0.115	7	5	9.127	5.661
Control vs. lglRNAi; UAS-BrC	1	0.7471	0.2529	0.08989	7	5	2.813	7.006
Control vs. lglRNAi; UAS-E93	1	0.5191	0.4809	0.07032	7	5	6.838	9.217
Control vs. lglRNAi; UAS-E93; UAS-p35	1	0.7131	0.2869	0.08029	7	5	3.573	7.943
lglRNAi vs. lglRNAi; BrCRNAi	1.633	2.049	-0.416	0.1493	5	5	2.786	7.998
lglRNAi vs. lglRNAi; UAS-BrC	1.633	0.7471	0.886	0.131	5	5	6.762	7.249
lglRNAi vs. lglRNAi; UAS-E93	1.633	0.5191	1.114	0.1184	5	5	9.405	5.792
lglRNAi vs. lglRNAi; UAS-E93; UAS-p35	1.633	0.7131	0.92	0.1246	5	5	7.382	6.598
lglRNAi; BrCRNAi vs. lglRNAi; UAS-BrC	2.049	0.7471	1.302	0.1295	5	5	10.05	7.315
lglRNAi; BrCRNAi vs. lglRNAi; UAS-E93	2.049	0.5191	1.53	0.1168	5	5	13.1	5.849
lglRNAi; BrCRNAi vs. lglRNAi; UAS-E93; UAS-p35	2.049	0.7131	1.336	0.123	5	5	10.86	6.668
lglRNAi; UAS-BrC vs. lglRNAi; UAS-E93	0.7471	0.5191	0.228	0.09222	5	5	2.472	7.042
lglRNAi; UAS-BrC vs. lglRNAi; UAS-E93; UAS-p35	0.7471	0.7131	0.034	0.1	5	5	0.3399	7.792
lglRNAi; UAS-E93 vs. lglRNAi; UAS-E93; UAS-p35	0.5191	0.7131	-0.194	0.08289	5	5	2.341	7.635
