# Supplementary material for: Antagonistic role of the BTB-zinc finger transcription factors Chinmo and Broad-Complex in the juvenile/pupal transition and in growth control
Source: eLife. 2023 Apr 28;12:e84648. doi: 10.7554/eLife.84648 (PMC10234633; doi:10.7554/eLife.84648)
Supplement: Figure 9—source data 1. [file elife-84648-fig9-data1.xlsx]

## Sheet: Figure 9 A
		BgChinmo			BgActin
	Sample	Ct	Ct average	sd	Ct	Ct average	sd	delta Ct	sd	Nro copies	sd			Whole Body
WHOLE BODY	Embryo 1	34.5754	34.7264	0.21346	31.0012	30.4279	0.810772	-4.29844	4.30374	0.0508206	0.151604			Mean	sd
		34.8773			29.8546								Embryo	0.170282	0.134806
	Embryo 2	34.49	34.415	0.106066	32.96	32.755	0.289914	-1.66	1.66339	0.316439	0.364845		N1	0.011577	0.00654164
		34.34			32.55								N4d3	0.00110523	0.000513587
	Embryo 3	33.89	34.125	0.33234	31.16	31.325	0.233345	-2.8	2.81965	0.143587	0.280632		N5d0	0.00470339	0.000914782
		34.36			31.49								N5d3	0.000749709	0.00056219
	N1 1	36.0707	36.0647	0.00847547	30.1715	30.0131	0.224095	-6.0516	6.05161	0.015076	0.0632386		N5d5	0.00240748	0.00107617
		36.0587			29.8546								N6d0	0.000753515	0.000274421
	N1 2	30.51	30.42	0.127279	24.51	24.42	0.127279	-6	6.00135	0.015625	0.0649972		N6d3	0.00242944	0.00082481
		30.33			24.33								N6d7	0.00172767	0.00081974
	N1 3	31.36	31.57	0.296985	23.36	23.615	0.360624	-7.955	7.96054	0.00403001	0.0222369
		31.78			23.87
	N4d3 1	34.0599	34.2349	0.24748	23.3827	23.3253	0.0812321	-10.9096	10.9124	0.000519853	0.00393212
		34.4099			23.2678
	N4d3 2	31.93	31.91	0.0282843	22.48	22.51	0.0424264	-9.4	9.40004	0.00148019	0.00964436
		31.89			22.54
	N4d3 3	32.68	32.725	0.0636396	22.99	23.155	0.233345	-9.57	9.57021	0.00131566	0.0087275
		32.77			23.32
	N5d0 1	36.5716	36.3151	0.362794	28.5549	28.5398	0.021293	-7.77525	7.78371	0.00456473	0.0246279
		36.0585			28.5248
	N5d0 2	30.36	31.625	1.78898	23.56	23.61	0.0707107	-8.015	8.21223	0.00386585	0.0220055
		32.89			23.66
	N5d0 3	32.63	32.83	0.282843	25.25	25.37	0.169706	-7.46	7.46536	0.00567958	0.0293895
		33.03			25.49
	N5d3 1	34.67	34.5055	0.232667	22.6995	22.8184	0.168072	-11.6871	11.6894	0.000303271	0.00245725
		34.341			22.9372
	N5d3 2	33.66	33.475	0.26163	22.53	22.685	0.219203	-10.79	10.7932	0.000564789	0.00422533
		33.29			22.84
	N5d3 3	34.02	33.995	0.0353553	24.26	24.495	0.33234	-9.5	9.50007	0.00138107	0.00909425
		33.97			24.73
	N5d5 1	37.2805	37.4732	0.272602	27.747	27.745	0.00283591	-9.7282	9.73202	0.00117902	0.00795334
		37.666			27.743
	N5d5 2	32.31	32.83	0.735391	24.23	24.38	0.212132	-8.45	8.48194	0.00285954	0.0168119
		33.35			24.53
	N5d5 3	34.26	34.12	0.19799	25.66	25.825	0.233345	-8.295	8.29736	0.00318388	0.0183114
		33.98			25.99
	N6d0 1	33.7386	33.7442	0.00797004	22.9612	22.8469	0.161765	-10.8974	10.8974	0.00052428	0.00396014
		33.7499			22.7325
	N6d0 2	31.53	31.595	0.0919239	21.56	21.71	0.212132	-9.885	9.88543	0.00105759	0.00724669
		31.66			21.86
	N6d0 3	33.85	33.76	0.127279	23.36	23.235	0.176777	-10.525	10.5258	0.000678671	0.00495152
		33.67			23.11
	N6d3 1	32.81	32.875	0.0919239	23.65	23.57	0.113137	-9.305	9.30545	0.00158094	0.0101972
		32.94			23.49
	N6d3 2	31.99	31.88	0.155563	23.35	23.605	0.360624	-8.275	8.27646	0.00322832	0.0185203
		31.77			23.86
	N6d3 3	32.54	32.7	0.226274	24.03	24.044	0.019799	-8.656	8.65896	0.00247904	0.0148791
		32.86			24.058
	N6d7 1	33.2694	33.5176	0.350925	23.5905	23.5696	0.0295429	-9.948	9.95419	0.0010124	0.0069853
		33.7657			23.5487
	N6d7 2	32.93	32.95	0.0282843	23.36	23.615	0.360624	-9.335	9.33504	0.00154841	0.0100191
		32.97			23.87
	N6d7 3	30.99	31.15	0.226274	22.31	22.575	0.374767	-8.575	8.57798	0.00262221	0.0155912
		31.31			22.84
PG	N5d0 1	36.5716	36.3151	0.362794	28.5549	28.5398	0.021293	-7.77525	7.78371	0.00456473	0.0246279
		36.0585			28.5248									PG
	N5d0 2	30.2	30.365	0.233345	23.56	23.29	0.381838	-7.075	7.07885	0.00741674	0.0363916			Mean	sd
		30.53			23.02								N5d0	0.00536539	0.00179071
	N5d0 3	31.23	31.55	0.452548	23.36	23.625	0.374767	-7.925	7.93791	0.00411469	0.0226396		N5d3	0.000827891	0.000738696
		31.87			23.89								N5d5	0.00111757	0.000558059
	N5d3 1	34.8671	34.6206	0.348623	22.57	22.6318	0.0875179	-11.9888	11.9938	0.000246048	0.00204552		N6d0	0.00051914	8.22934e-05
		34.3741			22.6937								N6d3	0.00121653	0.000389188
	N5d3 2	33.26	33.55	0.410122	22.85	22.795	0.0777817	-10.755	10.7628	0.000578659	0.00431692		N6d7	0.00186379	0.00115547
		33.84			22.74
	N5d3 3	32.89	32.9505	0.0855599	23.45	23.715	0.374767	-9.2355	9.2359	0.00165897	0.0106204
		33.011			23.98
	N5d5 1	37.228	37.4973	0.380814	27.1747	27.2745	0.141138	-10.2228	10.2299	0.000836806	0.00593365
		37.7666			27.3743
	N5d5 2	33.56	33.725	0.233345	24.26	24.575	0.445477	-9.15	9.15297	0.00176025	0.0111677
		33.89			24.89
	N5d5 3	33.65	33.385	0.374767	22.89	23.015	0.176777	-10.37	10.3768	0.000755647	0.00543509
		33.12			23.14
	N6d0 1	33.7439	33.7594	0.0220102	22.5961	22.6547	0.0828184	-11.1047	11.1048	0.000454089	0.00349523
		33.775			22.7132
	N6d0 2	33.15	33.37	0.311127	22.45	22.695	0.346482	-10.675	10.6795	0.000611653	0.00452775
		33.59			22.94
	N6d0 3	33.87	33.94	0.0989949	23.01	22.95	0.0848528	-10.99	10.9904	0.000491678	0.0037456
		34.01			22.89
	N6d3 1	32.91	32.875	0.0494975	23.65	23.57	0.113137	-9.305	9.30513	0.00158094	0.0101968
		32.84			23.49
	N6d3 2	33.67	33.83	0.226274	24.05	24.2	0.212132	-9.63	9.63266	0.00126206	0.00842661
		33.99			24.35
	N6d3 3	35.1943	35.1502	0.0623301	24.7471	24.8743	0.179853	-10.2759	10.2761	0.000806572	0.00574509
		35.1061			25.0015
	N6d7 1	33.2269	33.4668	0.339148	23.549	23.552	0.00411678	-9.9148	9.9206	0.00103597	0.00712379
		33.7066			23.5549
	N6d7 2	31.96	31.92	0.0565685	22.19	22.41	0.311127	-9.51	9.51017	0.00137153	0.00904104
		31.88			22.63
	N6d7 3	30.99	31.11	0.169706	22.63	22.815	0.26163	-8.295	8.29674	0.00318388	0.01831
		31.23			23
WING	N5d0 1	31.4077	31.2518	0.220464	24.2926	24.2979	0.00745239	-6.9539	6.95739	0.00806617	0.0388991			WING
		31.0959			24.3031									Mean	sd
	N5d0 2	29.86	29.755	0.148492	23.68	23.445	0.33234	-6.31	6.31175	0.0126038	0.0551411		N5d0	0.0158024	0.0097379
		29.65			23.21								N5d3	0.000769243	0.000326033
	N5d0 3	27.86	28.045	0.26163	22.66	22.82	0.226274	-5.225	5.23155	0.0267373	0.0969558		N5d5	0.000383066	0.000552989
		28.23			22.98								N6d0	0.00247367	0.000413315
	N5d3 1	32.9385	32.9309	0.0107193	21.4828	21.6592	0.249505	-11.2717	11.2717	0.00040446	0.00316003		N6d3	0.000422712	0.000229143
		32.9234			21.8357								N6d7	0.000142287	9.67958e-05
	N5d3 2	33.89	33.84	0.0707107	23.89	23.675	0.304056	-10.165	10.1652	0.000871024	0.00613724
		33.79			23.46
	N5d3 3	31.32	32.65	1.8809	22.48	22.73	0.353553	-9.92	10.0967	0.00103224	0.00722419
		33.98			22.98
	N5d5 1	32.1434	32.4194	0.390262	18.77	18.6107	0.225265	-13.8087	13.8142	6.96887e-05	0.00066729
		32.6953			18.4514
	N5d5 2	34.89	34.7	0.268701	20.58	20.625	0.0636396	-14.075	14.0776	5.79432e-05	0.0005654
		34.51			20.67
	N5d5 3	32.33	32.66	0.46669	22.98	22.725	0.360624	-9.935	9.94596	0.00102157	0.0070427
		32.99			22.47
	N6d0 1	34.9432	35.2706	0.463007	26.53	26.45	0.113137	-8.82062	8.83276	0.00221172	0.013541
		35.598			26.37
	N6d0 2	33.02	33.07	0.0707107	24.44	24.28	0.226274	-8.79	8.79028	0.00225916	0.013765
		33.12			24.12
	N6d0 3	31.88	31.895	0.0212132	23.65	23.49	0.226274	-8.405	8.40503	0.00295014	0.0171873
		31.91			23.33
	N6d3 1	34.3926	34.4386	0.0650003	20.4773	21.9375	2.06515	-12.5011	12.5012	0.000172507	0.00149481
		34.4846			23.3978
	N6d3 2	33.56	34.26	0.989949	23	23.215	0.304056	-11.045	11.0893	0.000473286	0.00363791
		34.96			23.43
	N6d3 3	32.32	32.545	0.318198	21.68	21.895	0.304056	-10.65	10.6548	0.000622344	0.0045962
		32.77			22.11
	N6d7 1	33.9573	33.1355	1.1622	19.1409	19.2365	0.1351	-13.899	13.9475	6.54593e-05	0.000632841
		32.3137			19.332
	N6d7 2	33.69	33.42	0.381838	20.2	20.275	0.106066	-13.145	13.1505	0.000110398	0.00100631
		33.15			20.35
	N6d7 3	34.34	34.17	0.240416	22.31	22.21	0.141421	-11.96	11.9624	0.000251004	0.00208126
		34			22.11

## Sheet: Figure 9 D
	Control		Bg-Chinmo RNAi
	Area of Wing (cm2)	Area of elytre (cm2)	Area of Wing (cm2)	Area of elytre (cm2)
	0.335665	0.229044	0.0999614	0.0864227
	0.343963	0.253699	0.108285	0.0962518
	0.348647	0.227567	0.08739	0.094571
	0.404881	0.302556	0.113703	0.0910528
	0.414655	0.303437	0.119246	0.104985
	0.451388	0.315494	0.093544	0.101148
	0.369366	0.273973	0.103577	0.0870315
	0.40804	0.298769	0.088443	0.0896997
	0.343088	0.254508	0.0968189	0.0973549
	0.369041	0.265207	0.136704	0.115973
	0.354745	0.27555	0.116968	0.101559
	0.314503	0.304861	0.110086	0.100628
	0.304147		0.111917	0.114106
			0.101137	0.0966865
Mean	0.366318	0.275389	0.10627	0.0983907
sd	0.0426156	0.030144	0.0133409	0.00897443
t test wing	3.37127e-17	***
t test elytre	6.06147e-17	***
