# Supplementary material for: Antagonistic role of the BTB-zinc finger transcription factors Chinmo and Broad-Complex in the juvenile/pupal transition and in growth control
Source: eLife journal article supplement (doi:10.7554/elife.84648), 2023-04-28
Supplement: figures [file elife-84648-figures-v2.pdf]

---

## Figures and figure supplements

Antagonistic role of the BTB-zinc finger transcription factors Chinmo and Broad-Complex in the juvenile/pupal transition and in growth control

**Sílvia Chafino et al.**

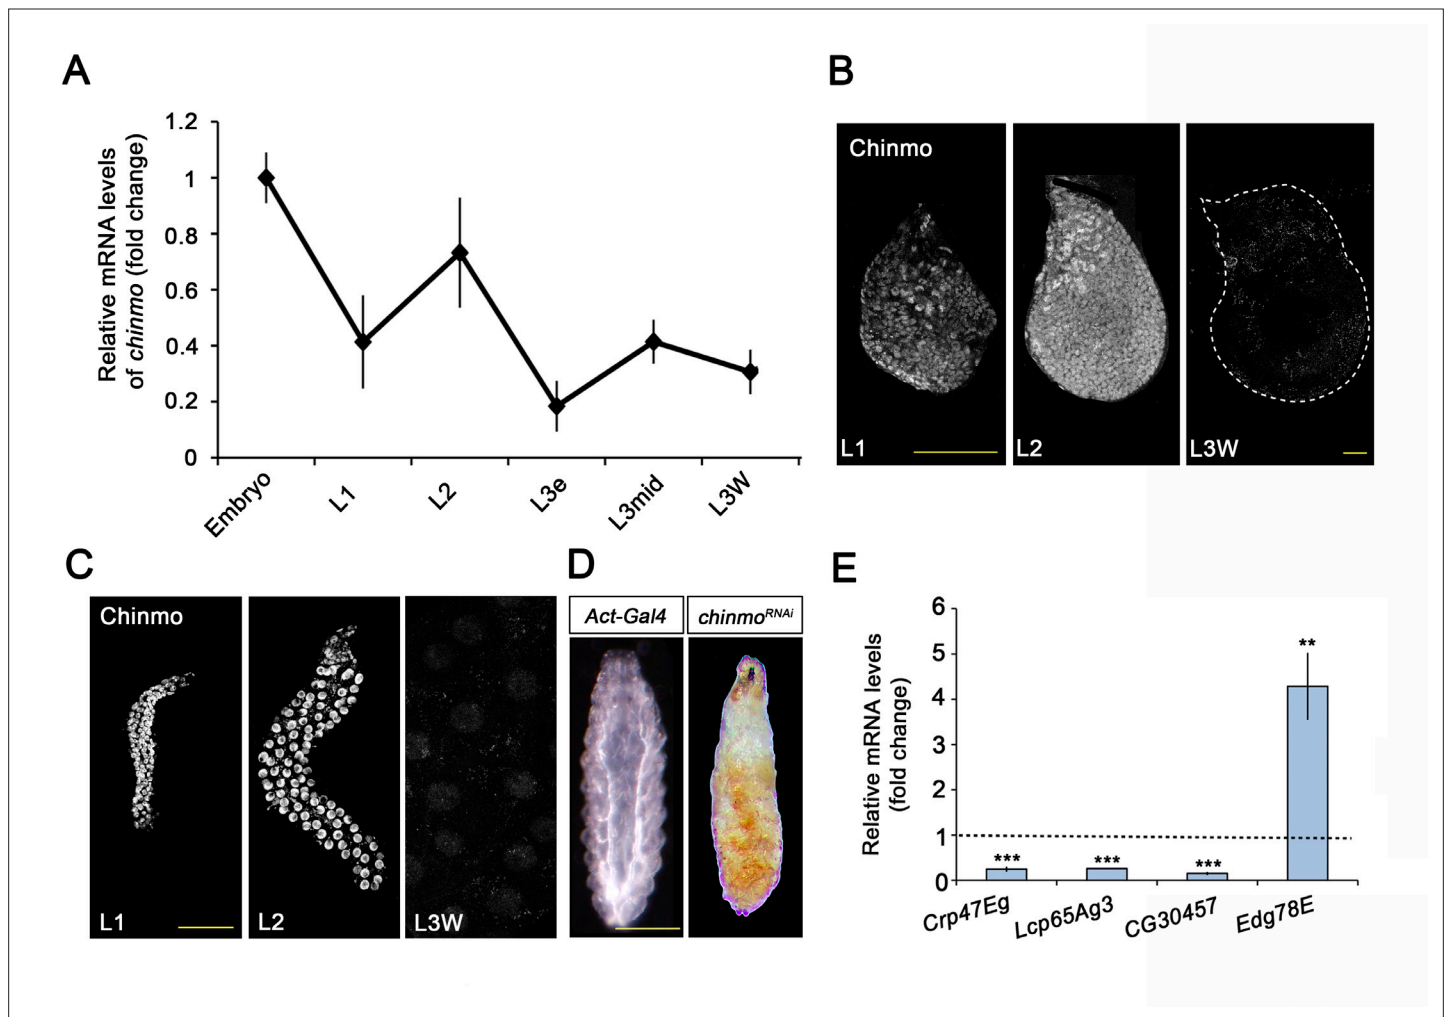

**Figure 1.** Chinmo is expressed during early larval stages and is essential for proper larval development. **(A)** *chinmo* mRNA levels measured by quantitative real-time reverse transcriptase polymerase chain reaction (qRT-PCR) from embryo to the wandering stage of L3 (L3W). Transcript abundance values were normalised against the *Rpl32* transcript. Fold changes were relative to the expression of embryo, arbitrarily set to 1. Error bars indicate the SEM (n = 3). **(B–C)** Chinmo protein levels in the wing disc **(B)** and salivary glands **(C)** of larval L1, L2, and L3W (females) stages. **(D)** Compared with the control (*Act-Gal4*), overexpression of *UAS chinmo*<sup>RNAi</sup> in the whole body induced developmental arrest at the L1 stage. Scale bars represent 50  $\mu$ m **(B and C)** and 0.5 mm **(D)**. **(E)** Relative expression of larval-specific (*Crp47Eg*, *Lcp65Ag3*, and *CG30457*) and pupal-specific genes (*Edg78E*) in *UAS-chinmo*<sup>RNAi</sup> L1 larvae measured by qRT-PCR. Transcript abundance values were normalised against the *Rpl32* transcript. Fold changes were relative to the expression in control larvae, arbitrarily set to 1 (dashed black line). Error bars indicate the SEM (n = 3). Statistical significance was calculated using t test (\*\*p < 0.005; \*\*\*p < 0.001).

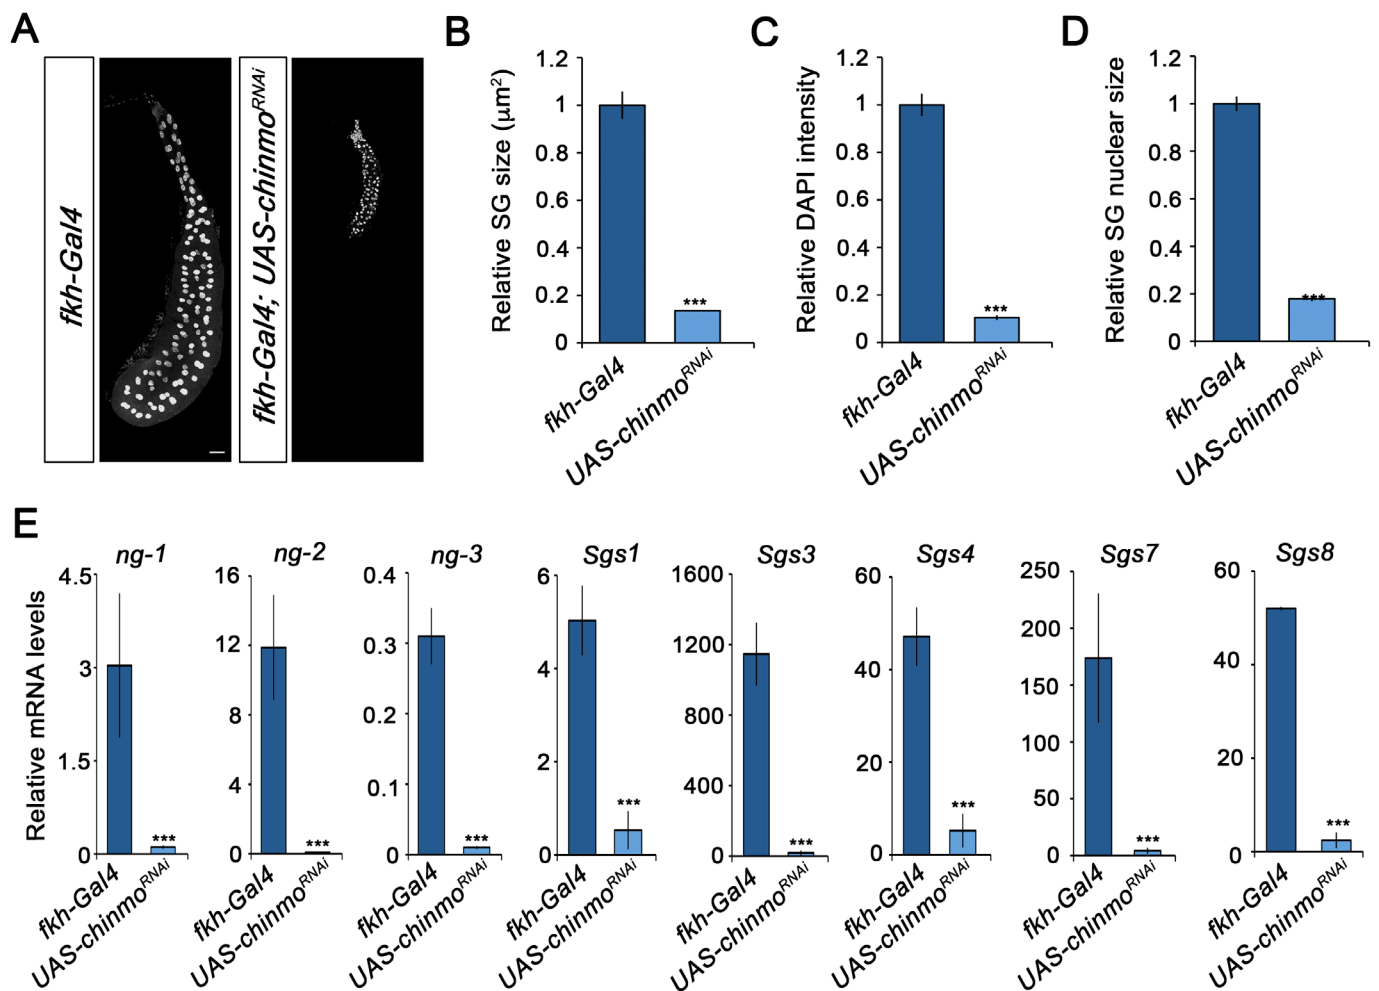

**Figure 2.** Chinmo is required for proper growth and function of the salivary glands during larval development. **(A)** DAPI staining of salivary glands from control (*fkh-Gal4*) and *UAS-chinmo<sup>RNAi</sup>* larvae at L3W. Scale bar represents 50  $\mu$ m. **(B–D)** Comparison of the relative size of salivary glands ( $n = 10$  for each genotype) **(B)**, DAPI intensity ( $n = 50$  for each genotype) **(C)**, and nucleic size of salivary glands ( $n = 50$  for each genotype) **(D)** between *UAS-chinmo<sup>RNAi</sup>* and control larvae at L3W. Error bars indicate the SEM ( $n = 5–8$ ). **(E)** Relative expression of *ng1-3* and *Salivary glands secretion* genes (*Sgs*) in *UAS-chinmo<sup>RNAi</sup>* L3W animals measured by quantitative real-time reverse transcriptase polymerase chain reaction (qRT-PCR). Transcript abundance values were normalised against the *Rpl32* transcript. Error bars indicate the SEM ( $n = 5–8$ ). Statistical significance was calculated using t test (\*\*\*) $p \leq 0.001$ .

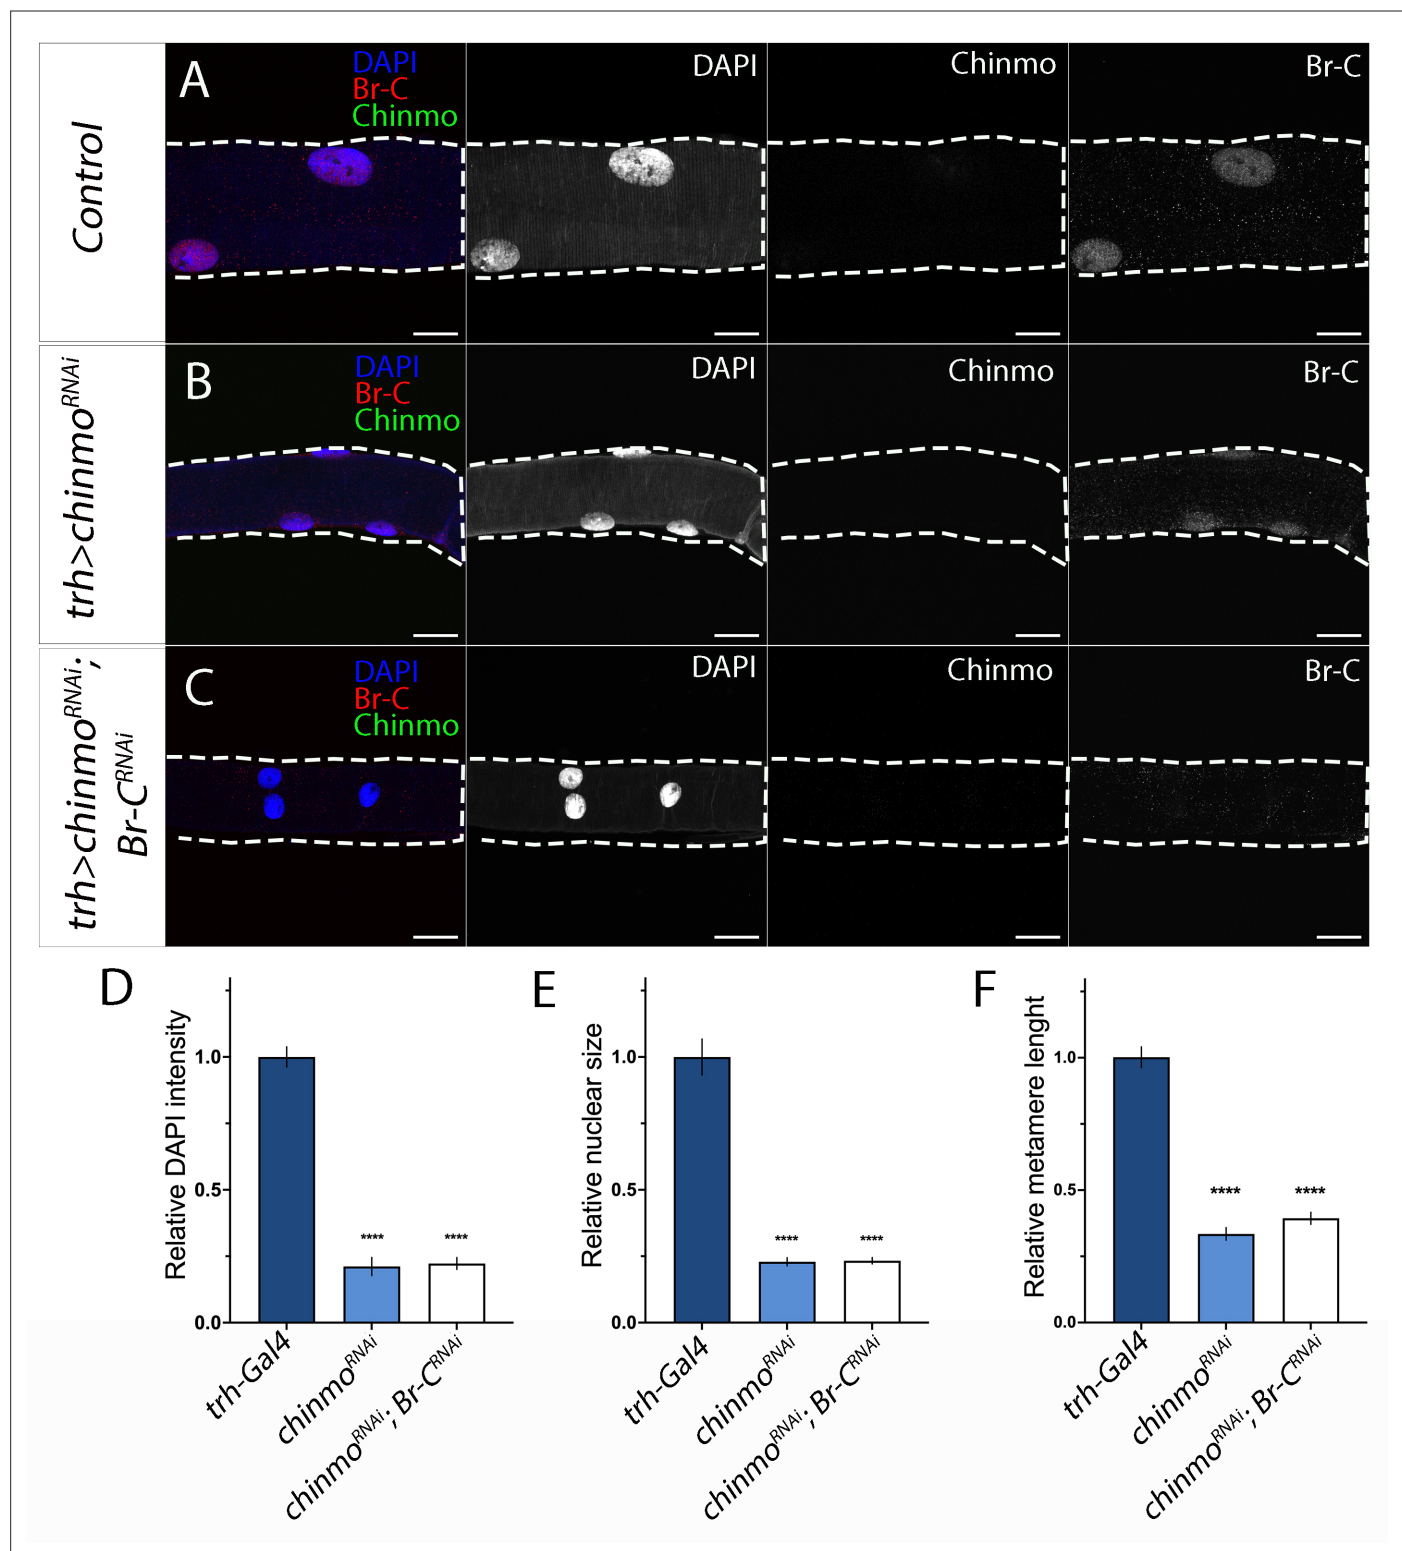

**Figure 2—figure supplement 1.** The role of *Chinmo* in the larval tracheal system. (A–C) *Chinmo* (in green), Br-C (in red) and DAPI-stained trachea from control (*trh-Gal4*) (A), *UAS-chinmo<sup>RNAi</sup>* (B) and *UAS-Br-C<sup>RNAi</sup>; UAS-chinmo<sup>RNAi</sup>* (C) mid L3 larvae. Growth defect of tracheal cells induced by the absence of *chinmo* (B) was not rescued by Br-C depletion (C). (D–F) Comparison of the relative size of the trachea by measuring (n = 10 for each genotype) (D), DAPI intensity (E), and nucleic size of tracheal cells (F), and tracheal metamere length of control, *UAS-chinmo<sup>RNAi</sup>* and *UAS-Br-C<sup>RNAi</sup>; UAS-chinmo<sup>RNAi</sup>* mid L3 larvae. Error bars indicate the SEM (n = 5–8). Statistical significance was calculated using t test (\*\*\*\*p < 0.001). Scale bars represent 50  $\mu$ m.



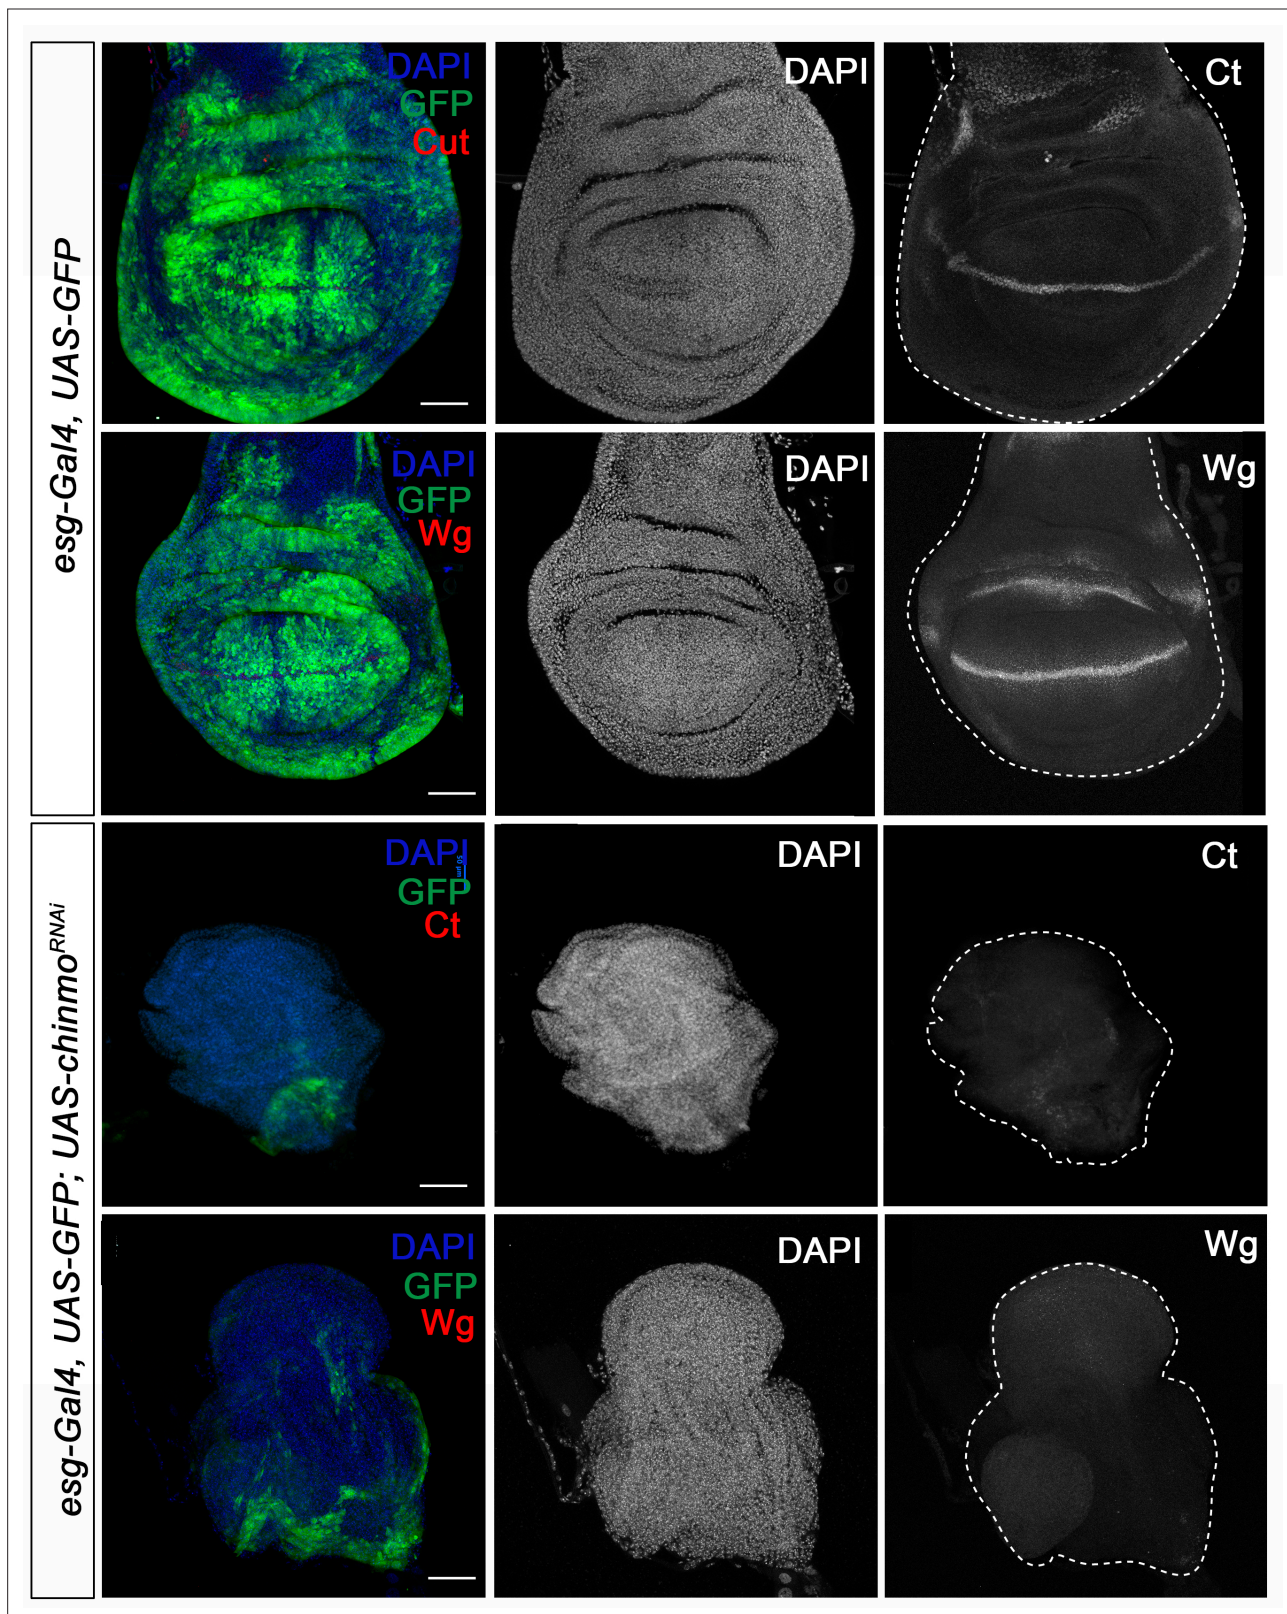

**Figure 3.** Chinmo is necessary for wing development during the larval period. Expression of Ct and Wg in wing discs of control (*esg-Gal4*) and *UAS-chinmo<sup>RNAi</sup>* L3W larvae. Wing discs were labelled to visualise the *esg* domain (GFP in green) and nuclei (DAPI). Ct and Wg were not detected in *UAS-chinmo<sup>RNAi</sup>*. Scale bars represent 50 μm.

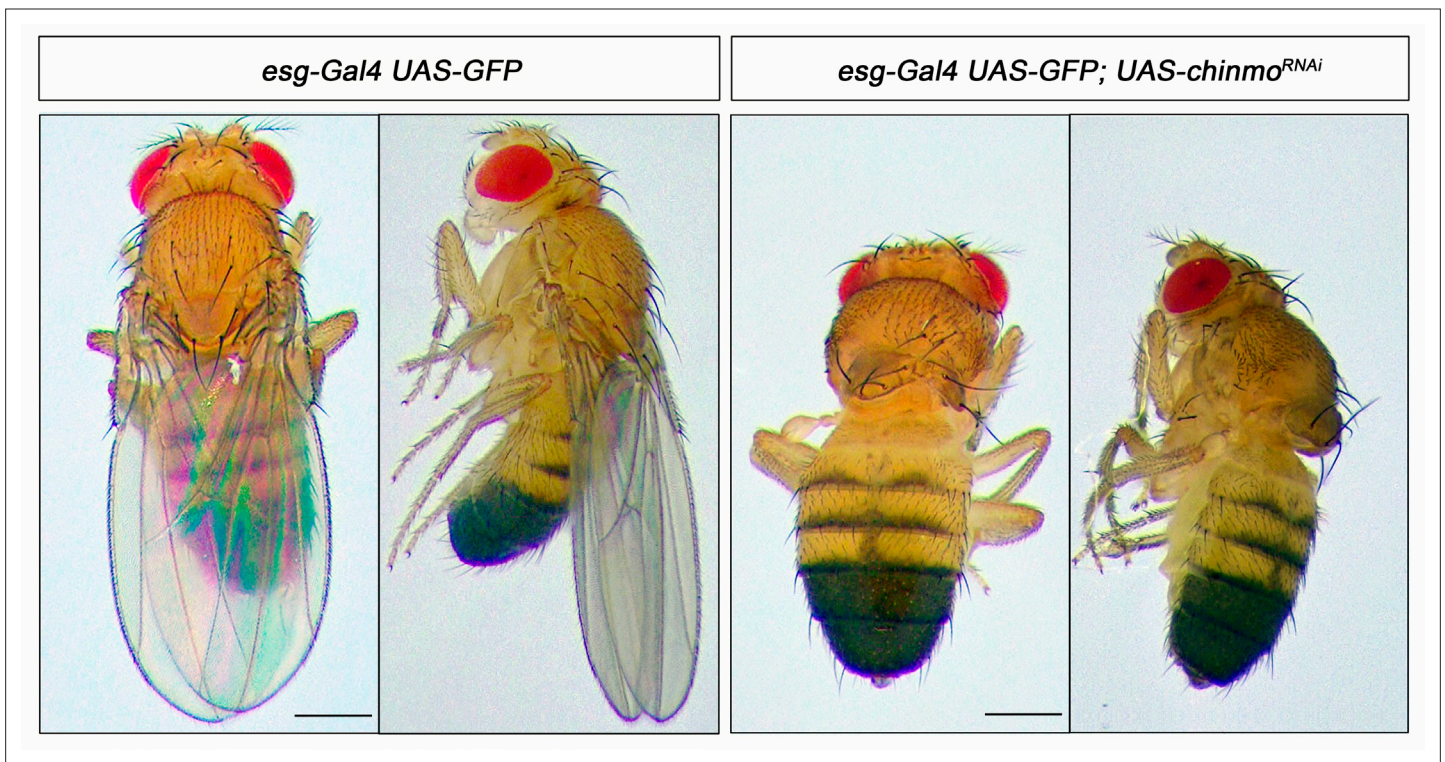

**Figure 3—figure supplement 1.** Chinmo is required for wing development during the larval period. Dorsal and lateral view of control (right panel) and *UAS-chinmo<sup>RNAi</sup>* (left panel) adult flies. In the absence of Chinmo, flies emerged without wings. Scale bar represents 1 mm.



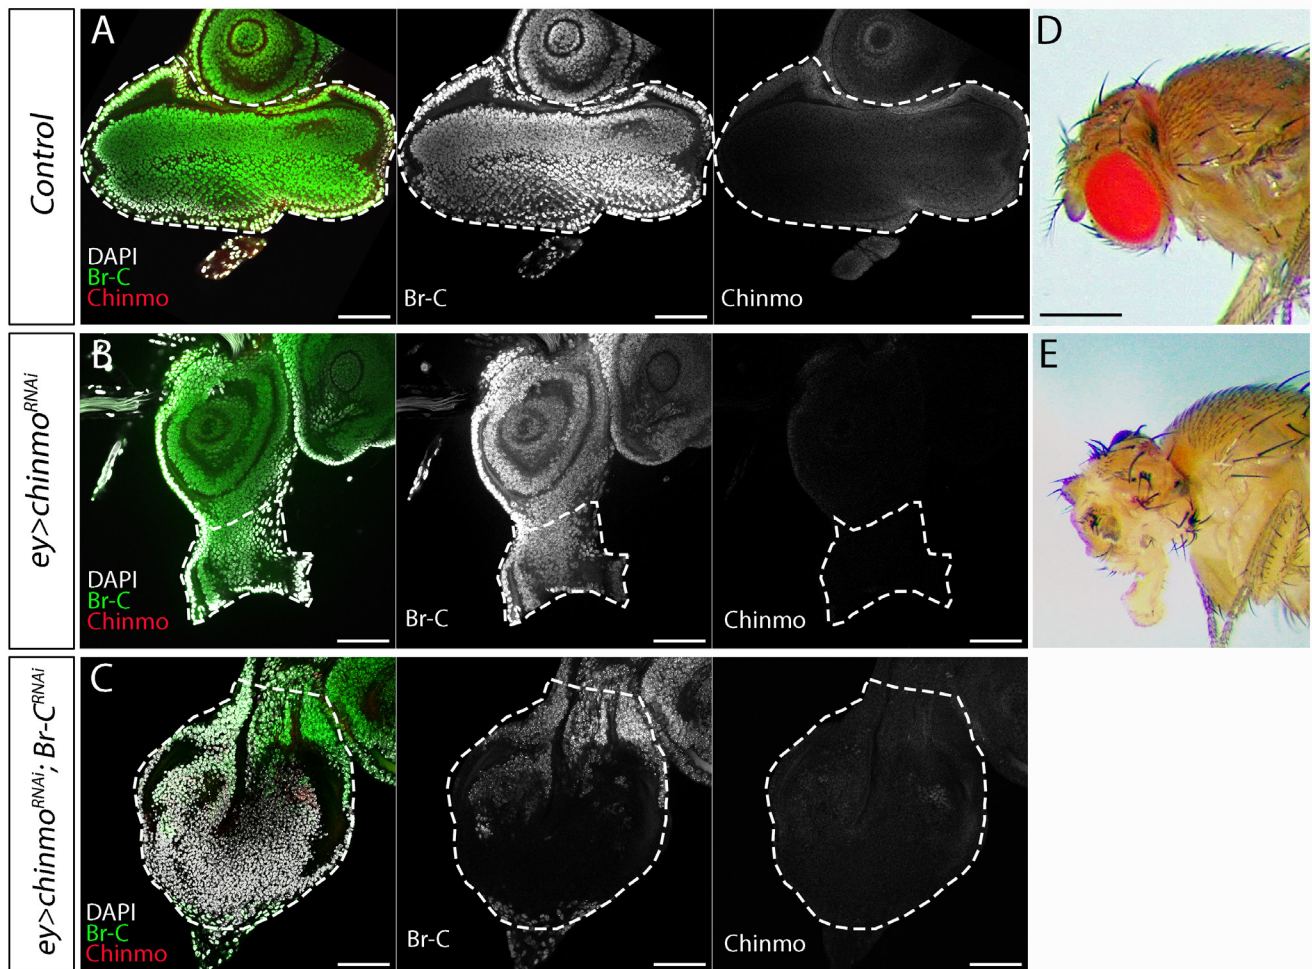

**Figure 3—figure supplement 2.** *Br-C*-dependent requirement of *chinmo* in the eye disc. (A–C) Chinmo (in red), *Br-C* (in green), and DAPI (in grey) staining in eye discs of control (*ey-Gal4*) (A), *UAS-chinmo*<sup>RNAi</sup> (B), and *UAS-Br-C*<sup>RNAi</sup>; *UAS-chinmo*<sup>RNAi</sup> (C) L3W larvae. The dramatic eye disc reduction induced by the absence of *chinmo* (B) was rescued by *Br-C* depletion (C). (D–E) Lateral view of control (D) and *UAS-chinmo*<sup>RNAi</sup> (E) adult flies. In the absence of *Chinmo*, flies emerged without eyes. Scale bars represent 50  $\mu$ m in A–C and 1 mm in D–E. Scale bars represent 50  $\mu$ m in A–C and 1 mm in D–E.

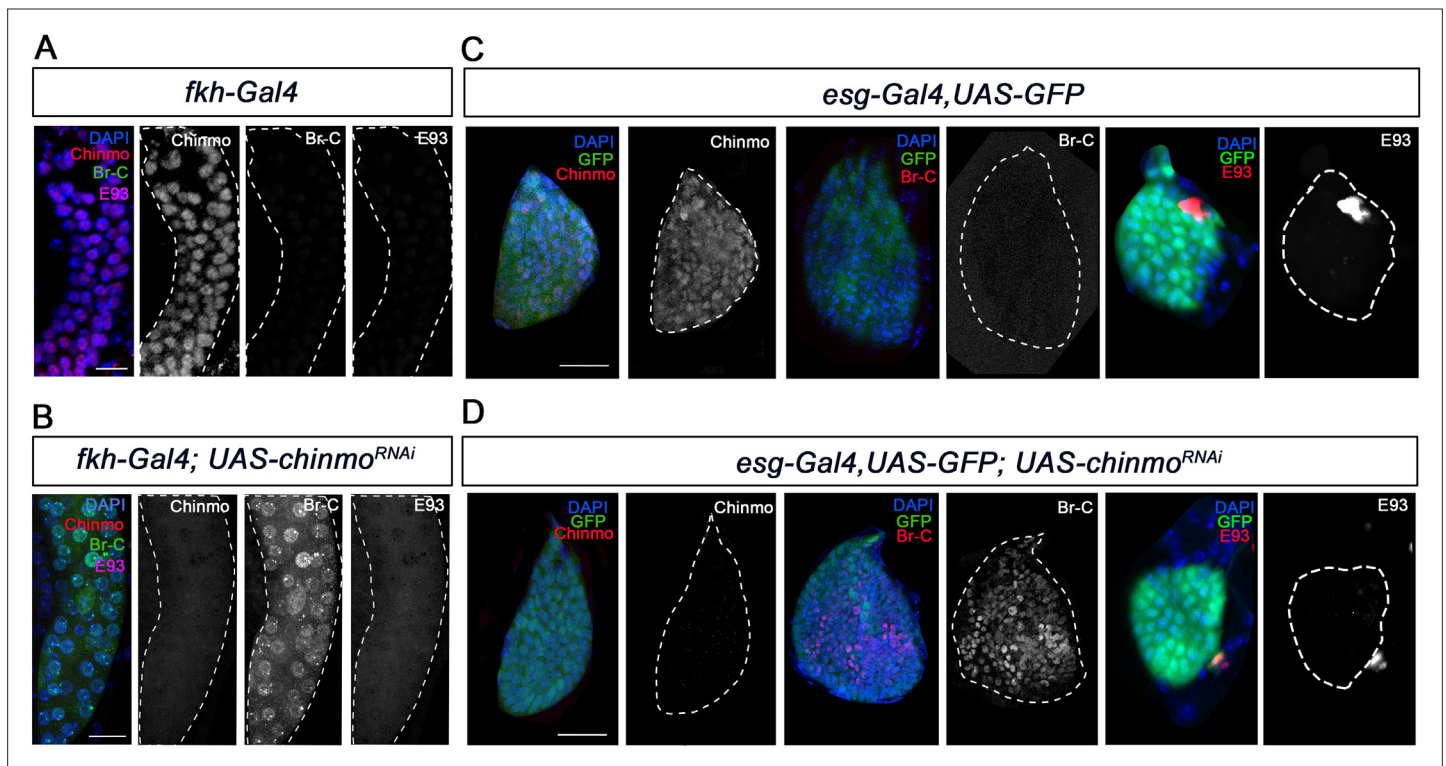

**Figure 4.** Chinmo represses Br-C in salivary glands and wing discs during early larval development. (A–B) Expression of Chinmo, Br-C, and E93 in salivary glands of L1 control (*fkh-Gal4*) (A), and *UAS-chinmo<sup>RNAi</sup>* (B). (C–D) Expression of Chinmo, Br-C, and E93 in wing discs of early L2 control (*esg-Gal4*) (C) and *UAS-chinmo<sup>RNAi</sup>* (D). The *esg* domain is marked with GFP and all cell nucleus with DAPI. In the absence of *chinmo* only Br-C shows early upregulation in both tissues. Scale bars represent 25  $\mu$ m.

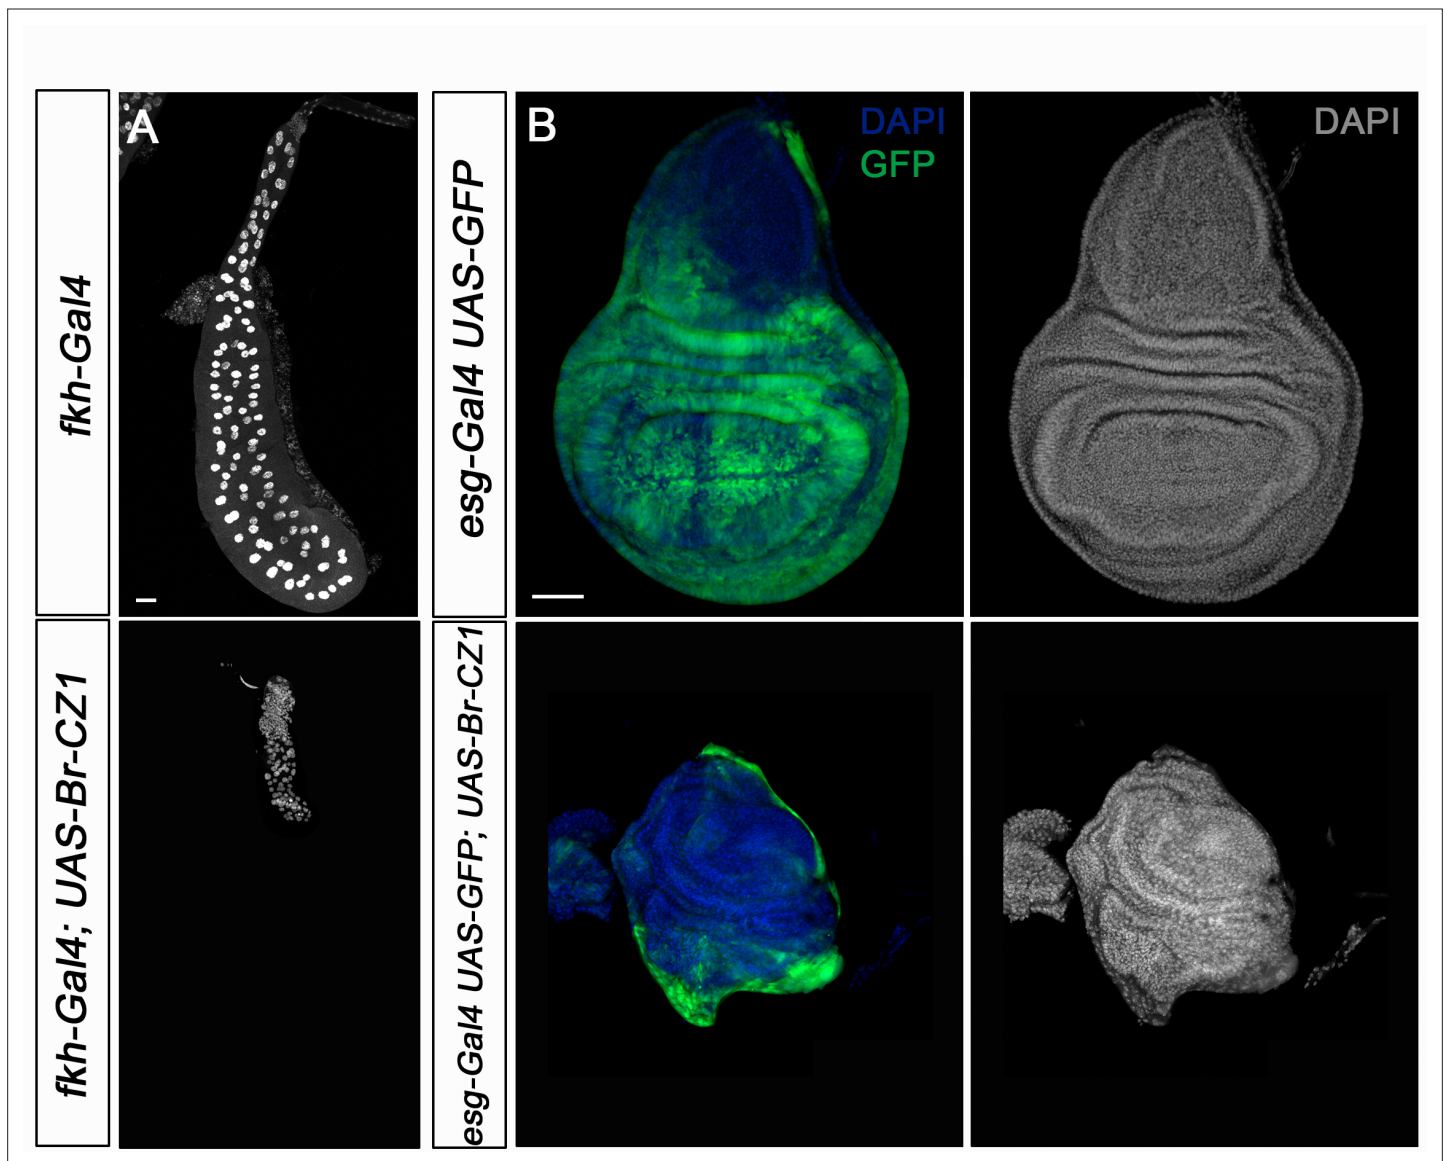

**Figure 4—figure supplement 1.** Overexpression of Br-CZ1 phenocopies *chinmo* loss of function in SGs and wing discs. **(A)** DAPI-stained SGs from control (*fkh-Gal4*) and *UASBr-CZ1* in L3W larvae. Overexpression of Br-CZ1 impairs SGs grow. **(B)** Wing discs of control (*esg-Gal4*) and *UA-SBr-CZ1* L3W larvae. Wing discs were labelled to visualise the *esg* domain (GFP in green) and nuclei (DAPI). Overexpression of Br-CZ1 in the *esg* domain abolishes wing development. Scale bar represents 50  $\mu$ m in all panels.



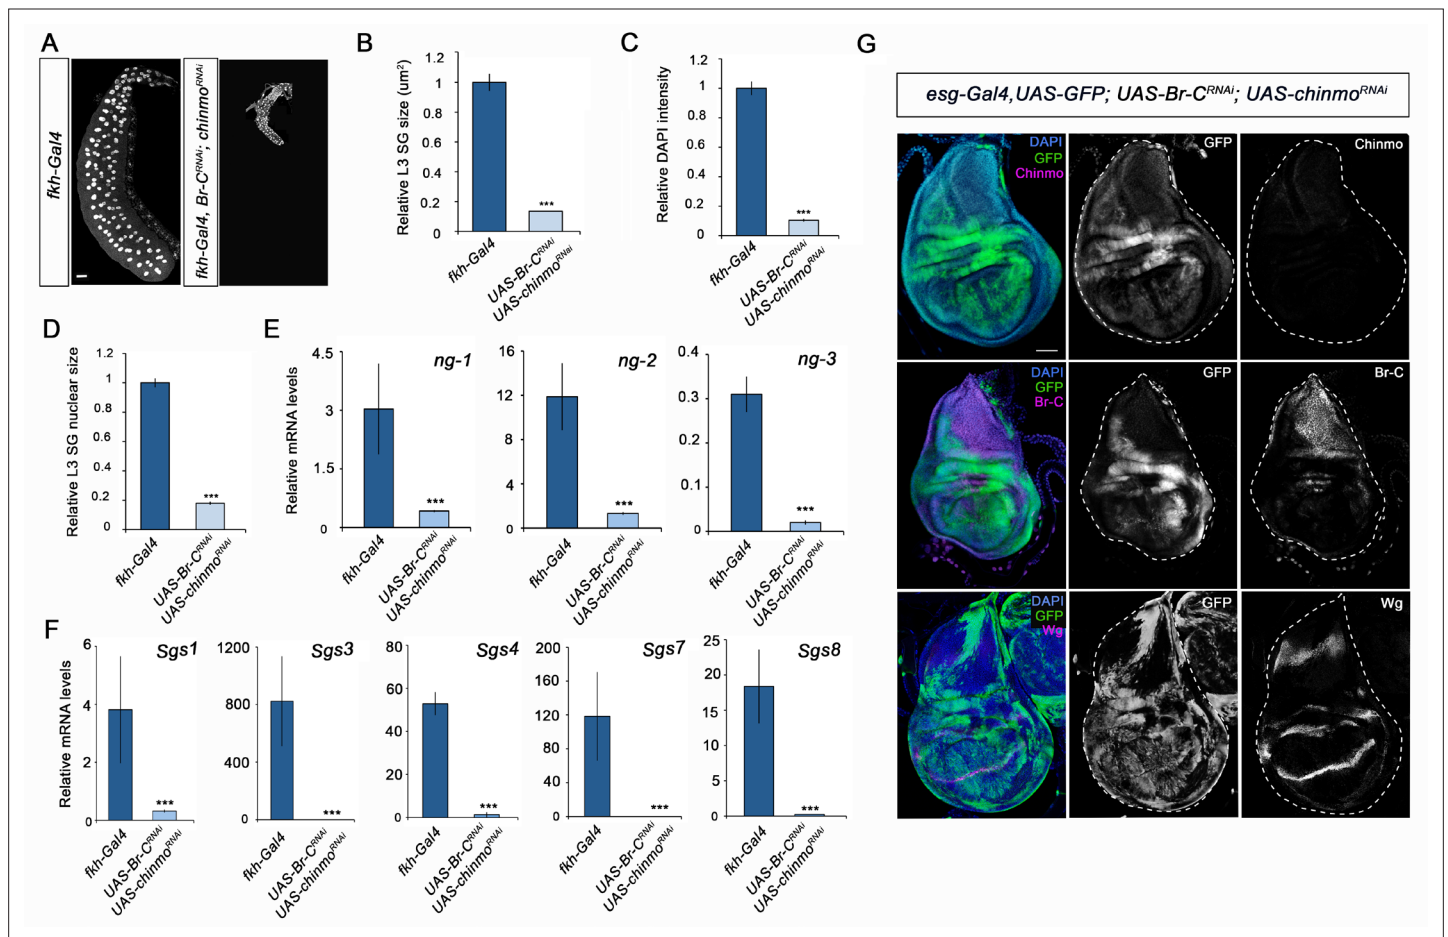

**Figure 5.** Different requirement of *chinmo* for the larval growth of salivary glands and wing discs. (A) DAPI-stained salivary glands from control (*fkf-Gal4*) and *UAS-Br-C<sup>RNAi</sup>; UAS-chinmo<sup>RNAi</sup>* L3W larvae. In the absence of *chinmo* and Br-C, salivary glands did not grow. (B–D) Comparison of the relative size of salivary glands (n = 10 for each genotype) (B), DAPI intensity (n = 50 for each genotype) (C), and nucleic size of salivary glands (n = 30 for each genotype) (D) of control and *UAS-Br-C<sup>RNAi</sup>; UAS-chinmo<sup>RNAi</sup>* L3W larvae. (E–F) Relative expression of (E) *ng1-3* and (F) *Salivary glands secretion* genes in control and *UAS-Br-C<sup>RNAi</sup>; UAS-chinmo<sup>RNAi</sup>* L3W larvae measured by quantitative real-time reverse transcriptase polymerase chain reaction (qRT-PCR). Transcript abundance values were normalised against the *Rpl32* transcript. Error bars in B and C indicate the SEM (n = 5–8). Statistical significance was calculated using t test (\*\*\*\*p < 0.001). (G) Expression of Chinmo, Br-C, and Wg in wing discs of *UAS-Br-C<sup>RNAi</sup>; UAS-chinmo<sup>RNAi</sup>* L3W larvae. Wing discs labelled to visualise the *esg* domain (GFP in green). In the absence of *chinmo* and Br-C, wing discs grow normally and express Wg correctly. Scale bars represent 50 μm.



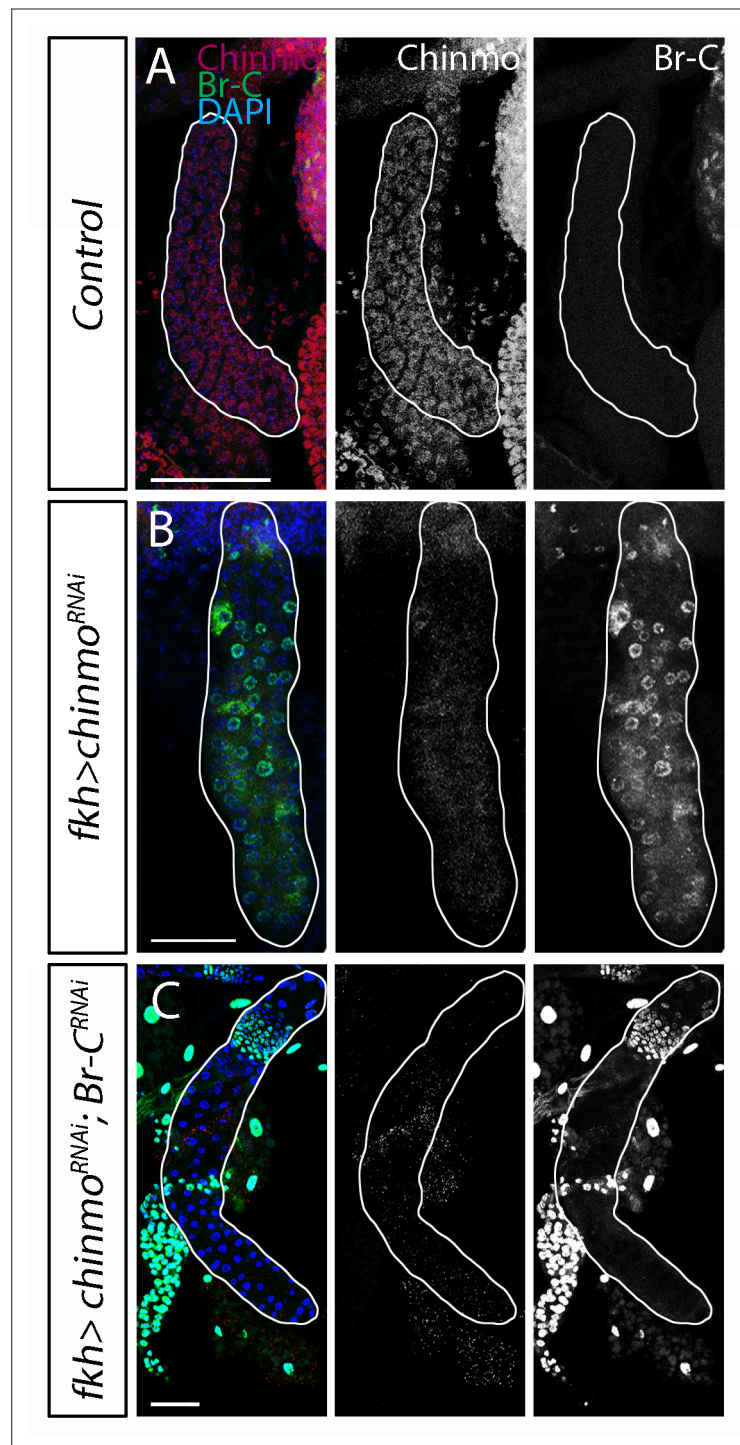

**Figure 5—figure supplement 1.** Effectiveness of *chinmo* and *Br-C* RNAis in the salivary glands. (A–C) Expression of Chinmo (in red) and Br-C (in green) in SG of control (*fkh-Gal4*) (A) *UAS-chinmo*<sup>RNAi</sup> and (B) *UAS-Br-C*<sup>RNAi</sup>; *UAS-chinmo*<sup>RNAi</sup> (C) L2 larvae. Nuclei of SG cells are labelled with DAPI (in blue). Note that the (C) double knockdown of *chinmo* and *Br-c* completely abolished the expression of Br-C in the absence of Chinmo (C). Scale bars represent 50  $\mu$ m.

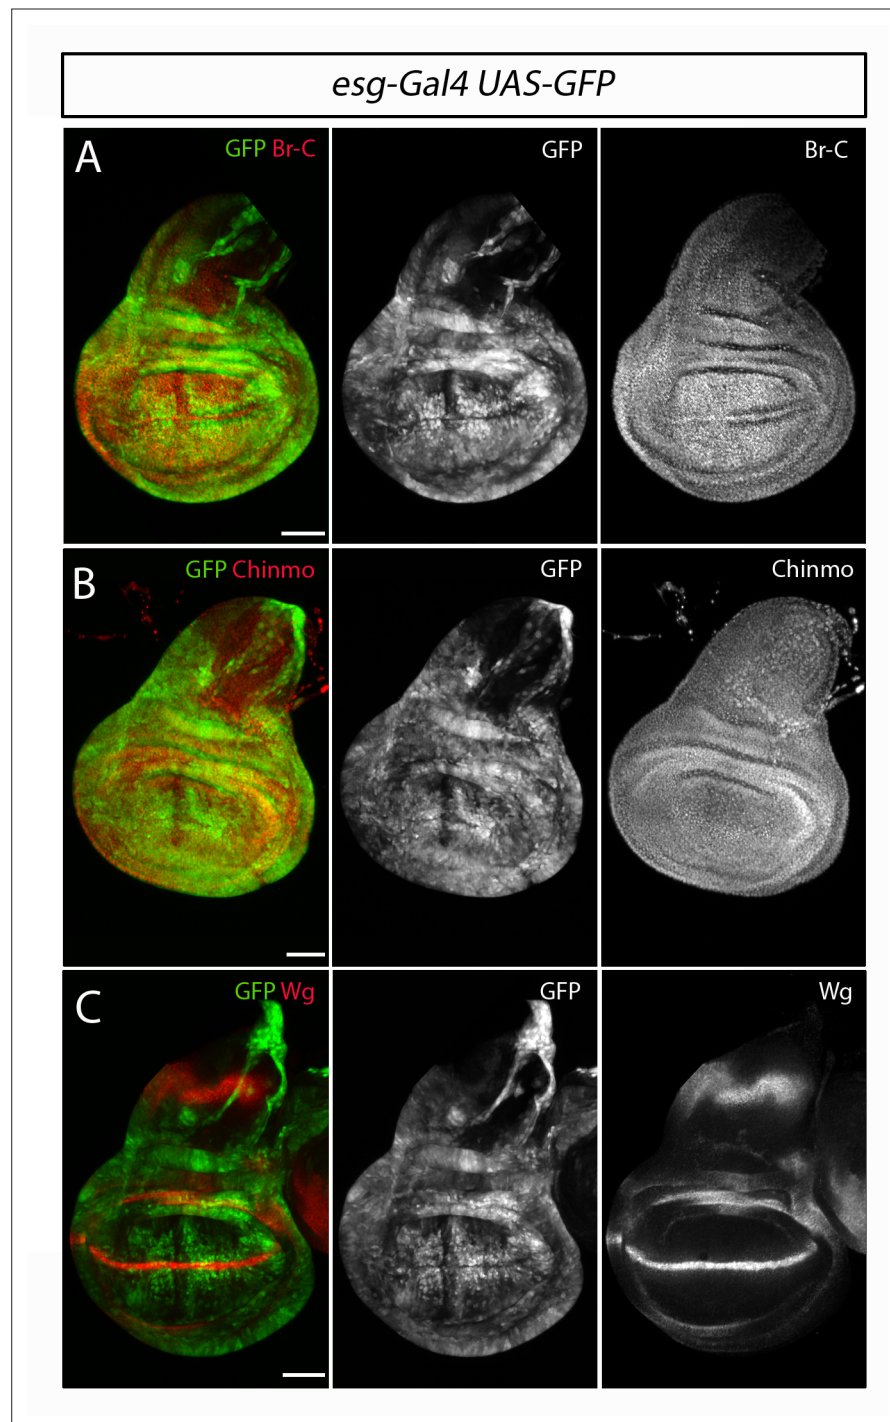

**Figure 5—figure supplement 2.** Expression of Chinmo and Br-C in the developing wing disc. **(A–C)** Control wing discs, *esg-Gal4; UAS-GFP*, were labelled to visualise the *esg* domain in green and in red **(A)** Br-C expression in L3W larvae, **(B)** Chinmo expression in early-mid L3 larvae and **(C)** the morphogenetic marker Wg in L3W larvae. Scale bar represents 50  $\mu$ m in all panels.



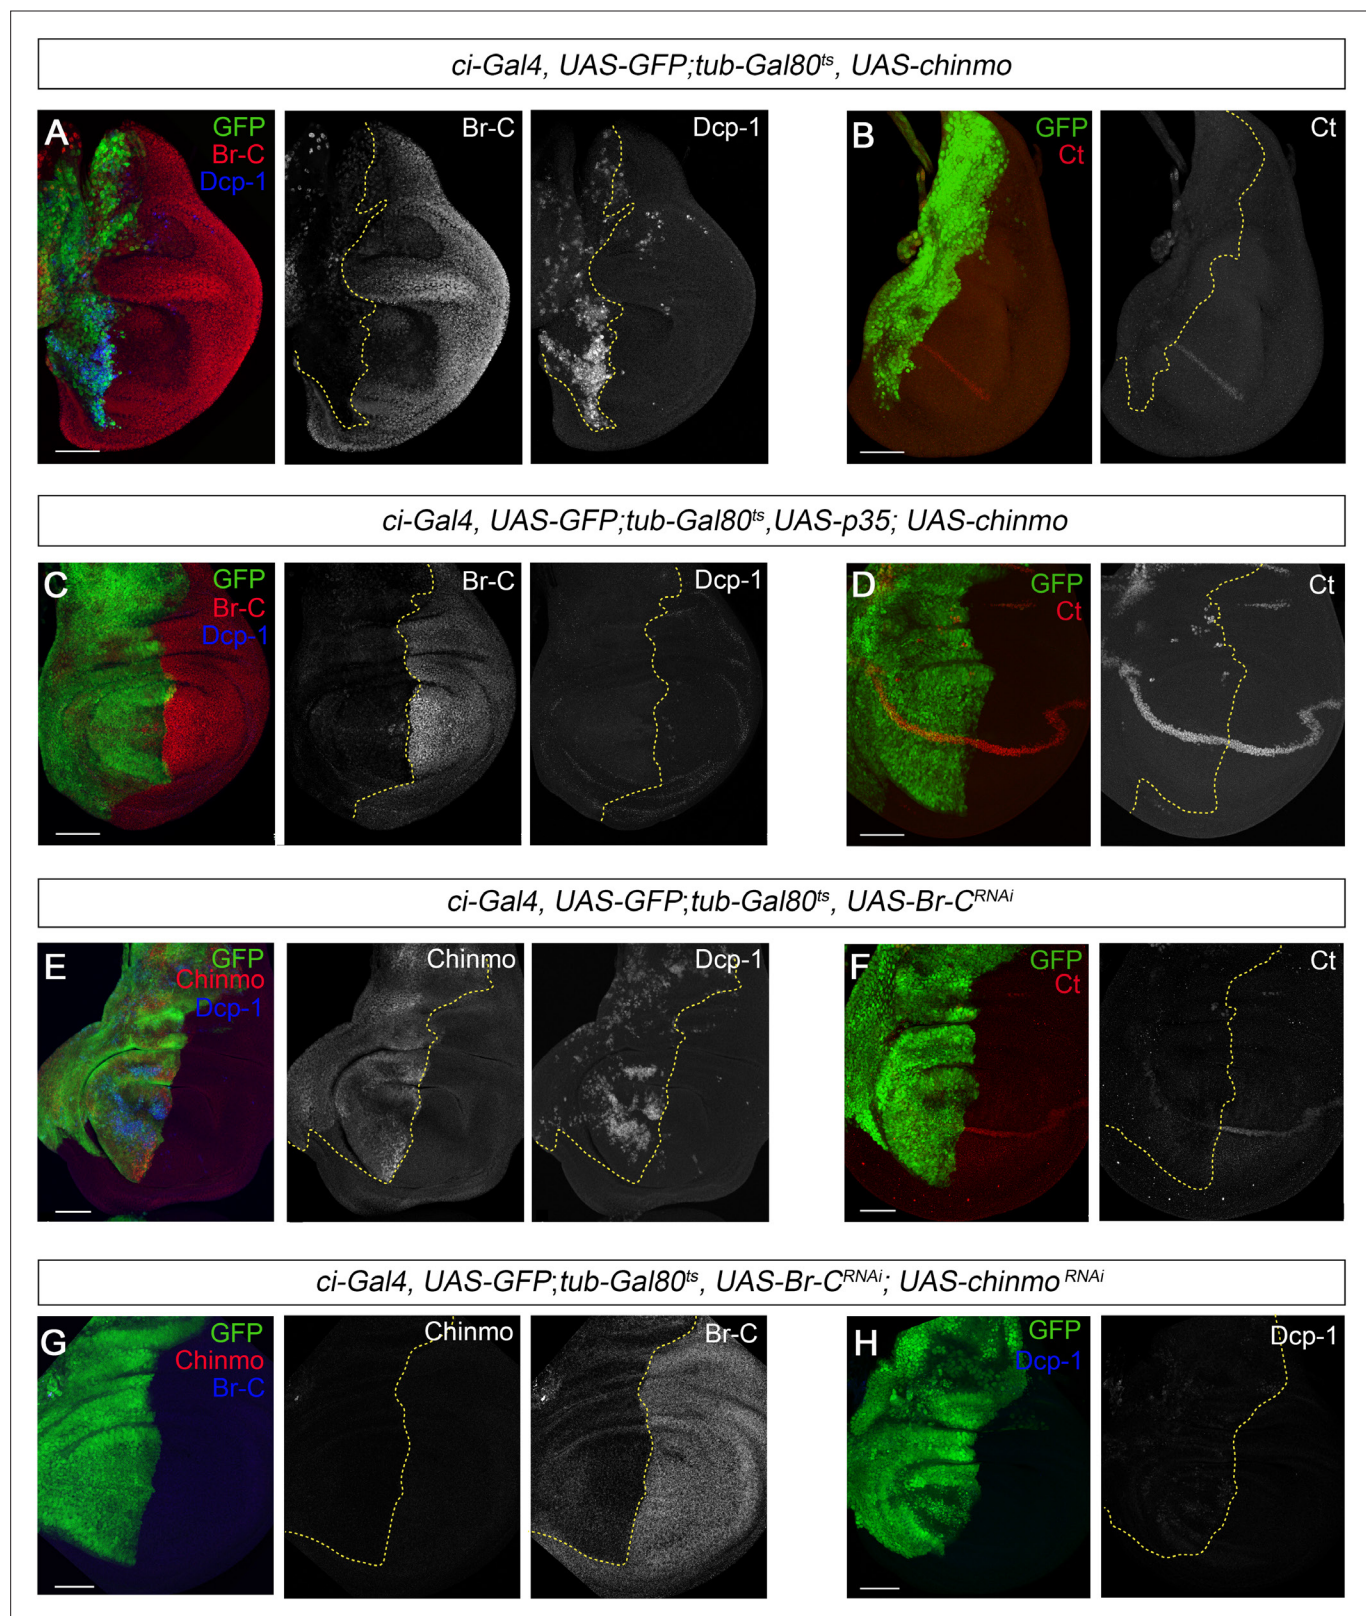

**Figure 6.** *chinmo* depletion during late L3 is required for proper larva to pupa transition. (A–H) Images of wing imaginal discs from L3W larvae. The indicated constructs were expressed under the control of the *ci-Gal4* driver. Overexpression or depletion of the transgenes was activated in early L3 larvae and analyzed at the L3W stage. An *UAS-GFP* construct was used to mark the anterior region of the disc where the transgenes were induced or repressed (green). (A) Overexpression of *chinmo* repressed Br-C, induced Dcp-1, and (B) abolished Ct. (C) Overexpression of *chinmo* together with p35

Figure 6 continued on next page

## Figure 6 continued

repressed Br-C and blocked Dcp-1, but fails to restore normal expression of Ct (**D**). (**E**) Depletion of *Br-C* induced *Chinmo* and Dcp-1 and (**F**) repressed Ct. (**G**) In double depletion of *Br-C* and *chinmo* (**H**), Dcp-1 was not detected. Scale bars represent 50  $\mu$ m.

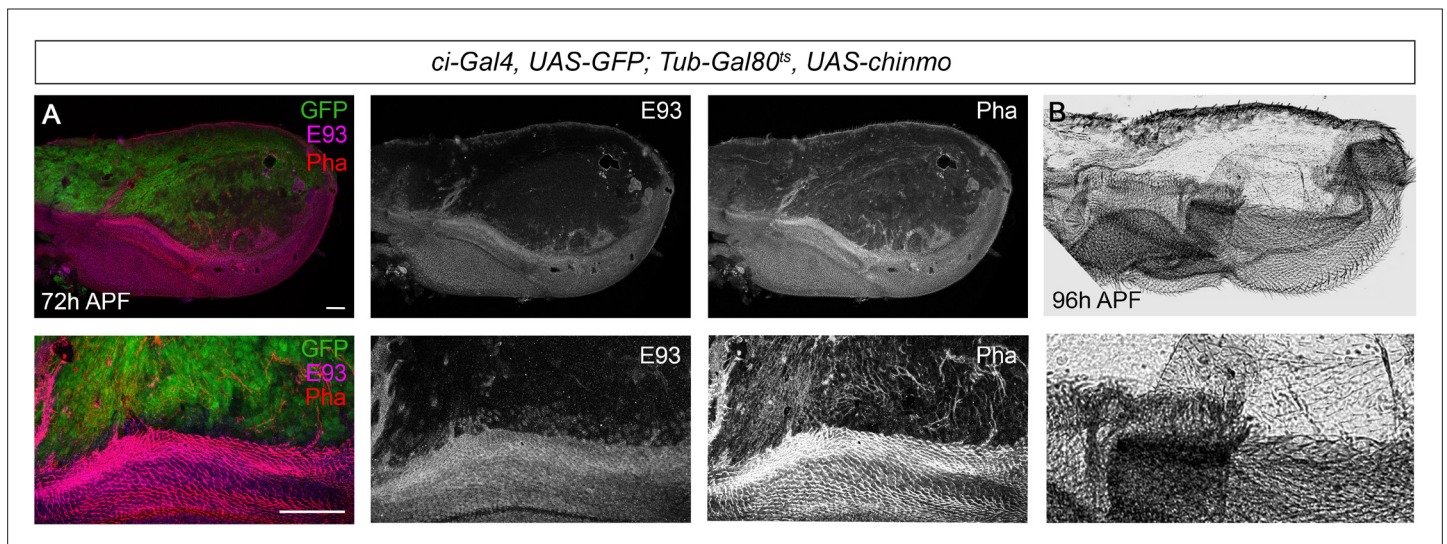

**Figure 7.** Presence of Chinmo during pupal development blocks adult differentiation. **(A)** Overexpression of *chinmo* in the anterior part of the pupal wing at 72 hr after pupa formation (APF) using *ci-Gal4* driver represses *E93* expression and produced alterations in phalloidin (Pha) pattern. **(B)** Cuticle preparation of a pupal wing at 96 hr APF expressing *chinmo* under the control of the *ci-Gal4* driver. Bottom panels are magnifications from upper images. The scale bars represent 50  $\mu$ m (top panels) and 100  $\mu$ m (bottom panels).



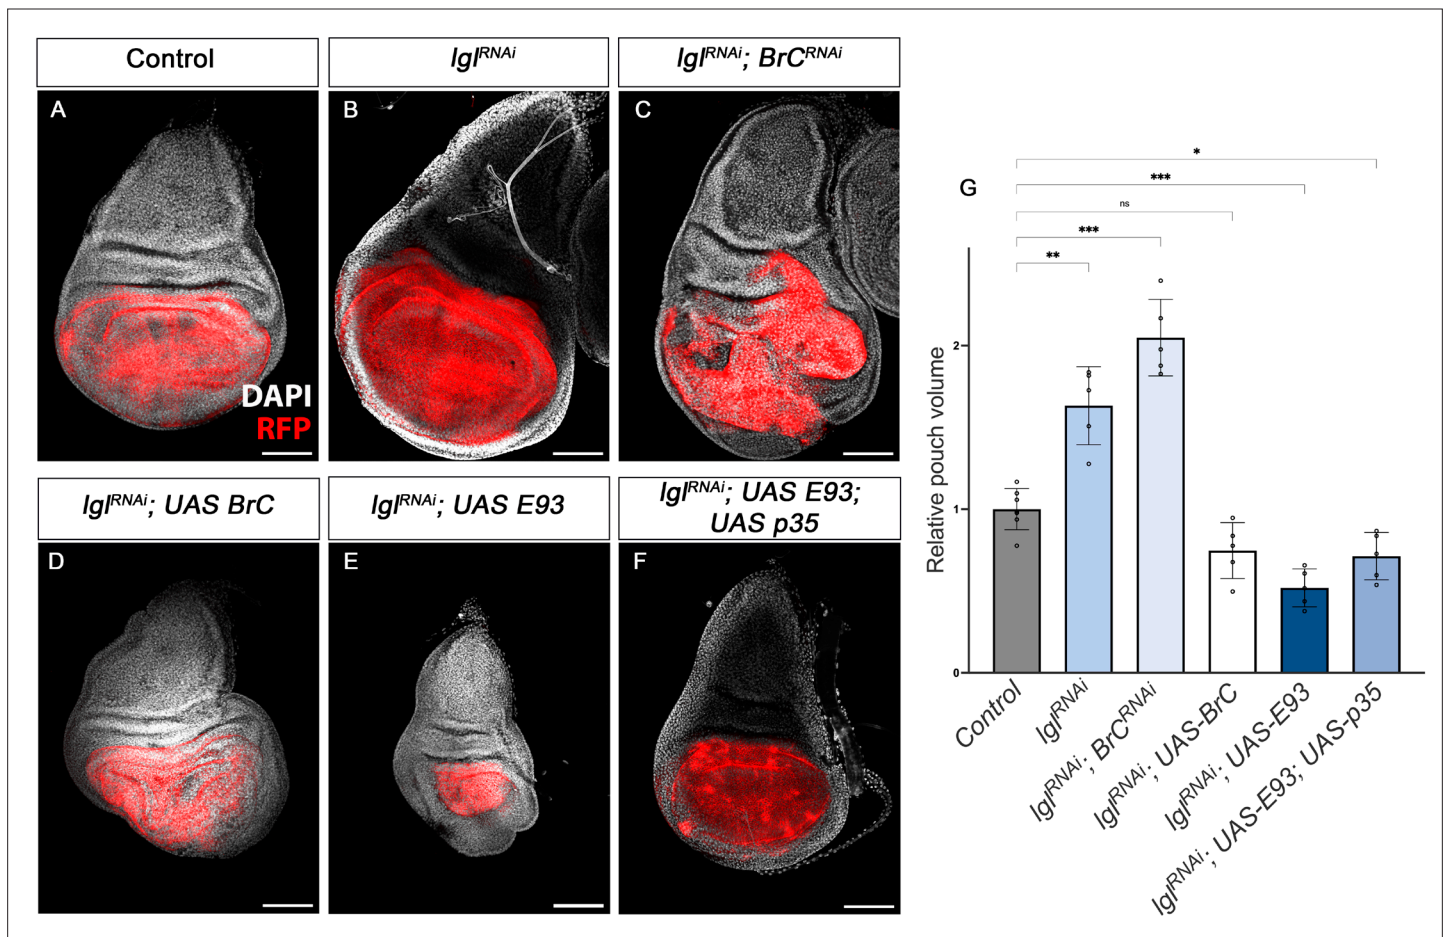

**Figure 8.** Tumour suppression action of Br-C and E93. (A–F) Confocal images of L3 wing imaginal discs. The indicated constructs were expressed under the control of the *nub-Gal4* driver. An *UAS-RFP* construct was used to mark the pouch region of the disc where the transgenes were induced (magenta). Nuclei were labelled with DAPI (grey). Scale bars at 100  $\mu$ m. (G) Volumetric quantification of the RFP-positive area of the wing discs for the indicated groups. The pouch volumes were normalised to the mean of the control. Error bars in G indicate the SEM (n = 10). Welch's ANOVA (p < 0.0001) followed by Dunnett's T3 post hoc tests (\*p < 0.05, \*\*p < 0.01, \*\*\*p < 0.001).



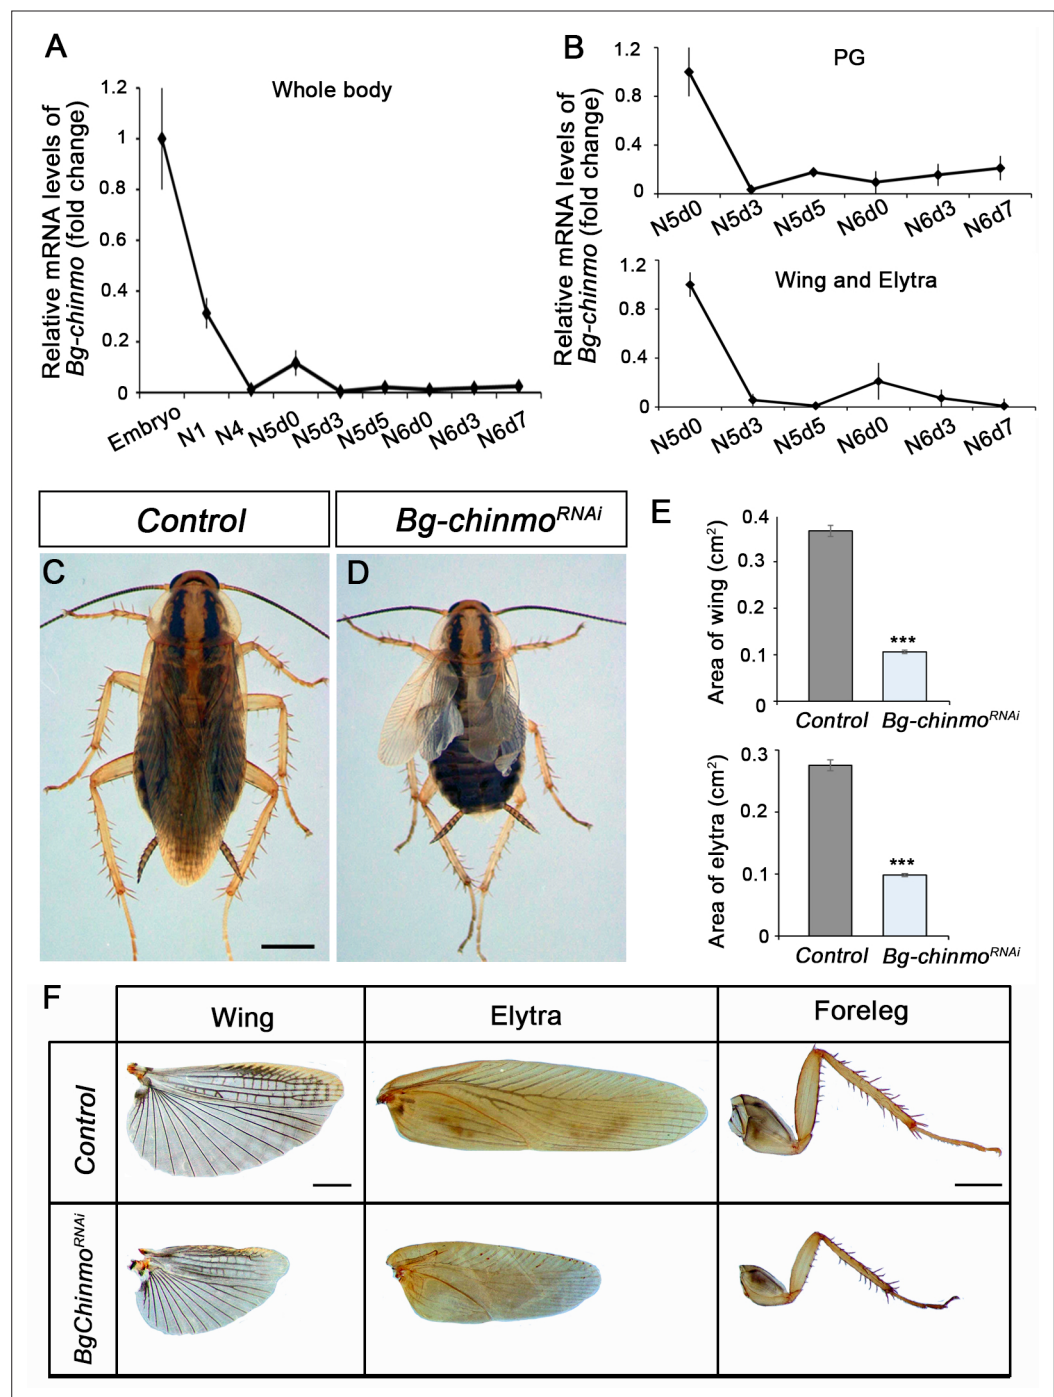

**Figure 9.** Depletion of *chinmo* in *B. germanica* promotes premature adulthood. (A–B) *Bg-chinmo* mRNA levels measured by quantitative real-time reverse transcriptase polymerase chain reaction (qRT-PCR) from embryo to the last nymphal stage (N6) in whole body (A), and prothoracic gland (PG), and wings and elytra (B). Transcript abundance values were normalised against the *Rpl32* transcript. Fold changes were relative to the expression of embryo (for whole body) or N5d0 (for PG and wings and elytra), arbitrarily set to 1. Error bars indicate the SEM (n = 3–5). (C–D) Newly moulted N4 nymphs of *B. germanica* were injected with *dsMock* (Control) or *dschinmo* (*Bg-chinmo*<sup>RNAi</sup>) and left until adulthood. (C) Dorsal view of adult Control, and (D) premature adult *Bg-chinmo*<sup>RNAi</sup>. (E) Quantification of wing and elytra areas (cm<sup>2</sup>) of adult Control and *Bg-chinmo*<sup>RNAi</sup> premature adults. Error bars indicate the SEM (n = 4–6). Statistical significance was calculated using t-test (\*\*\*p ≤ 0.001). (F) Control and *Bg-chinmo*<sup>RNAi</sup> wing, elytra and foreleg of newly emerged adult of *B. germanica*. The scale bar represents 2 mm.
