# Supplementary figures and images for: Antagonistic role of the BTB-zinc finger transcription factors Chinmo and Broad-Complex in the juvenile/pupal transition and in growth control
Source: eLife journal article supplement (doi:10.7554/elife.84648), 2023-04-28

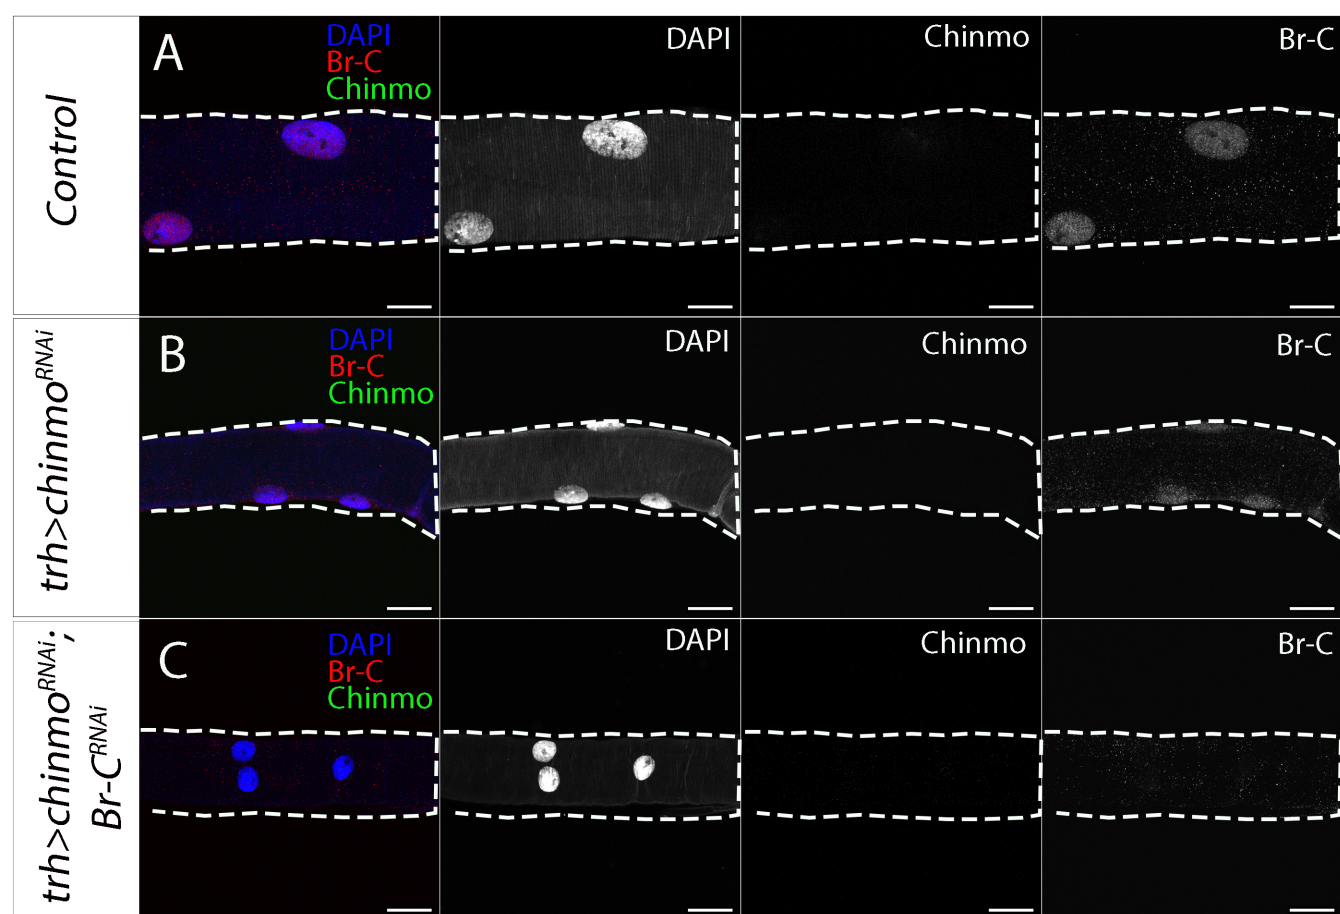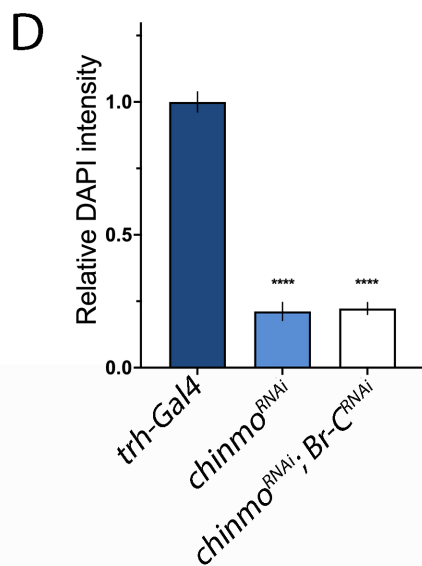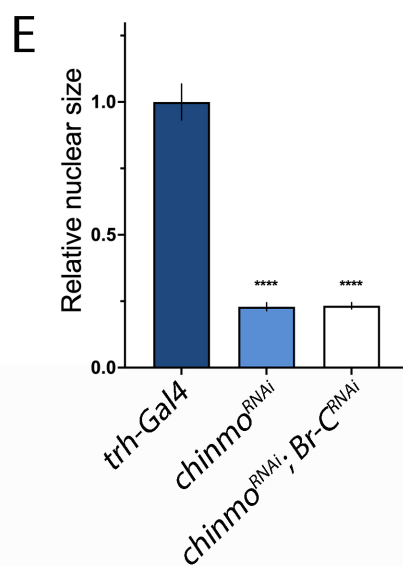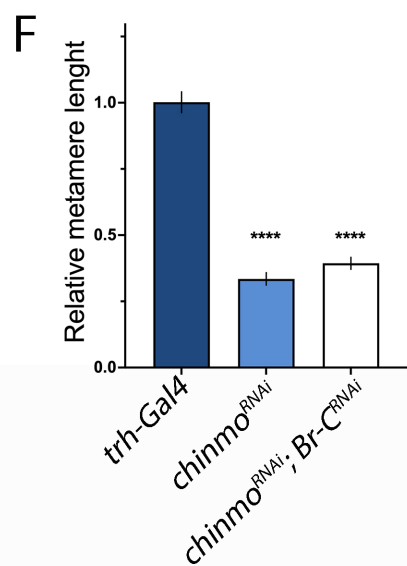

Supplement: supp [file elife-84648-supp-v1.zip]

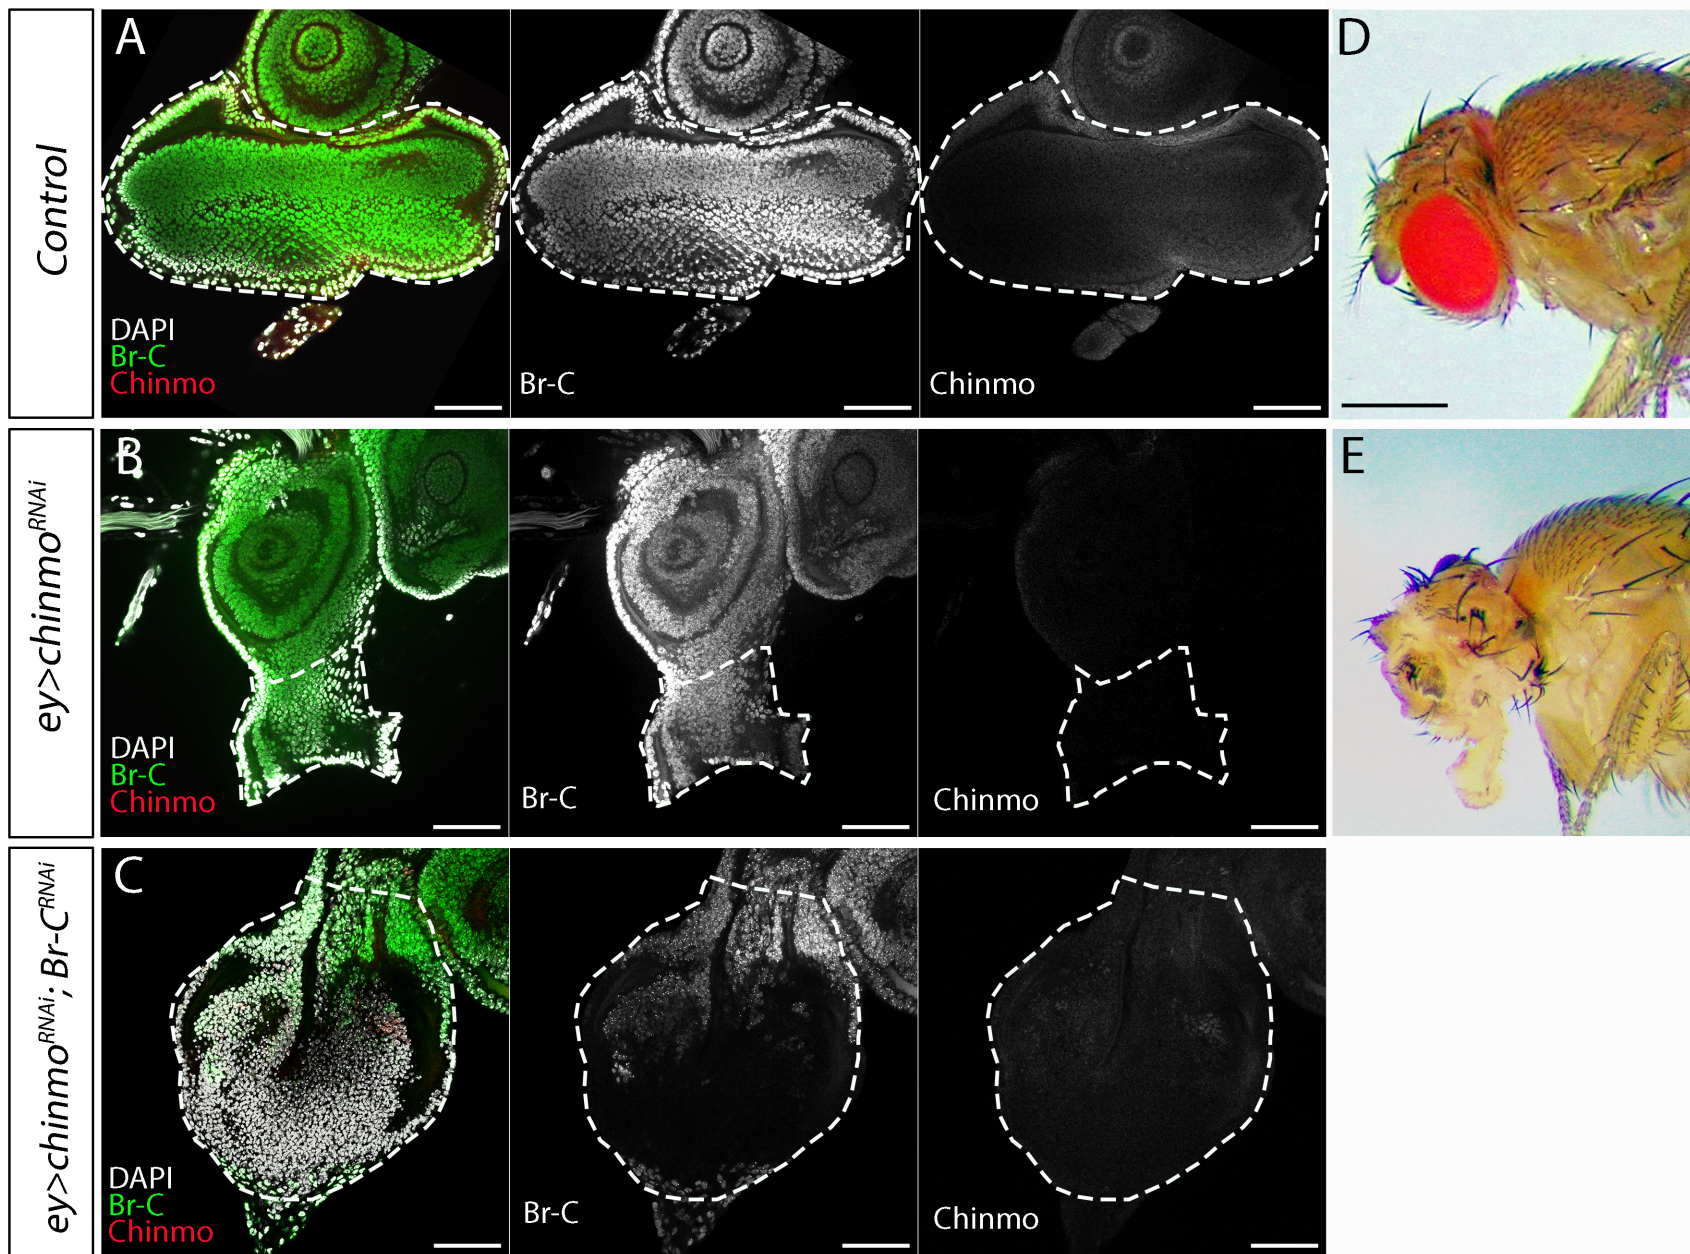

Supplement: supp [file elife-84648-supp-v1.zip]

*esg-Gal4 UAS-GFP*

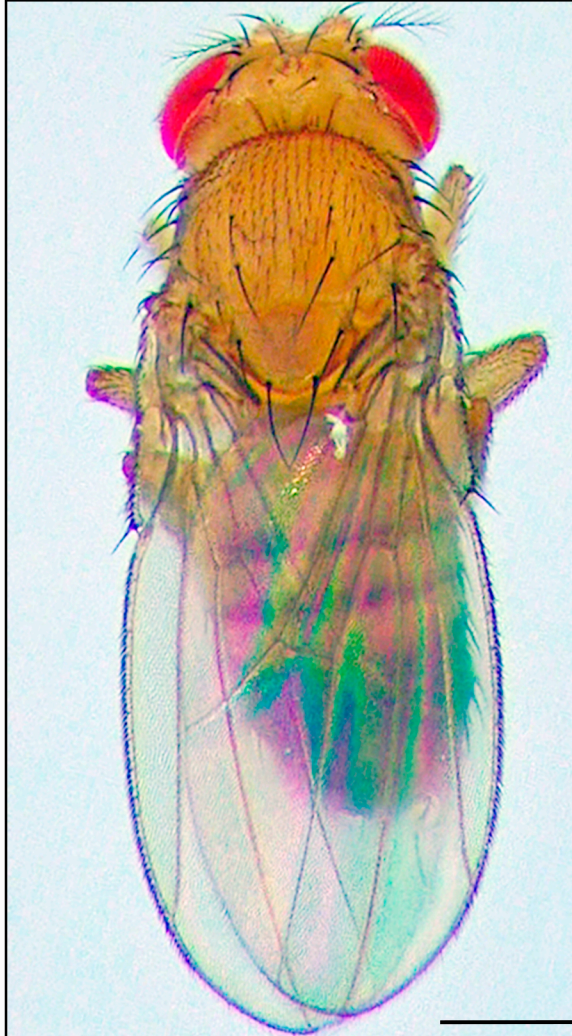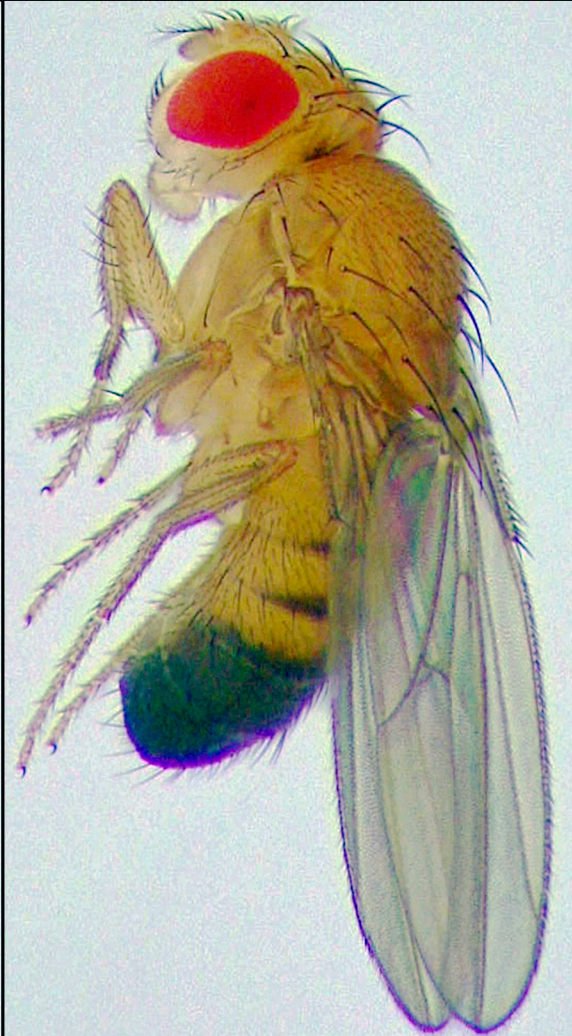

*esg-Gal4 UAS-GFP; UAS-chinmo<sup>RNAi</sup>*

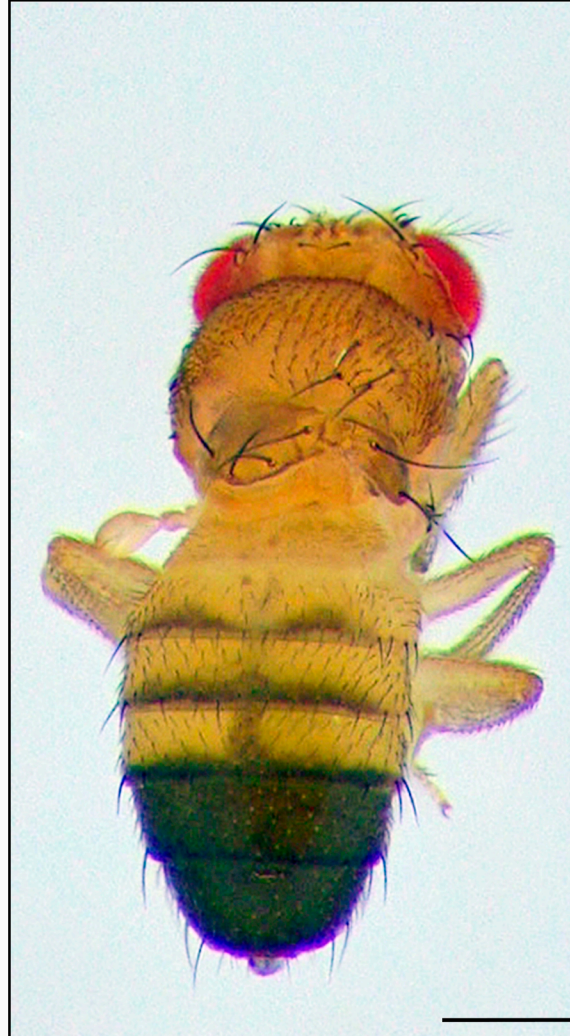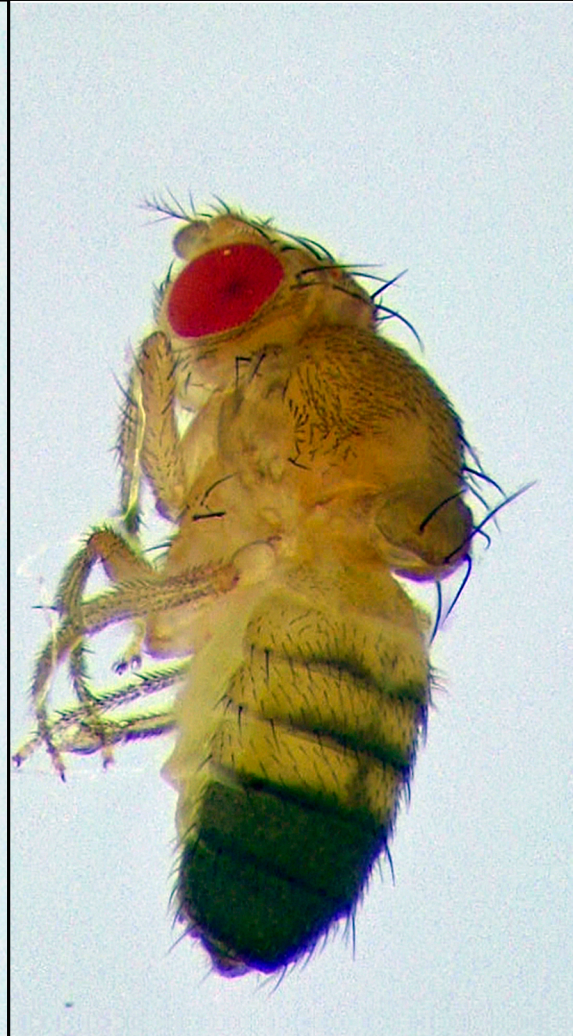

Supplement: supp [file elife-84648-supp-v1.zip]

*esg-Gal4 UAS-GFP*

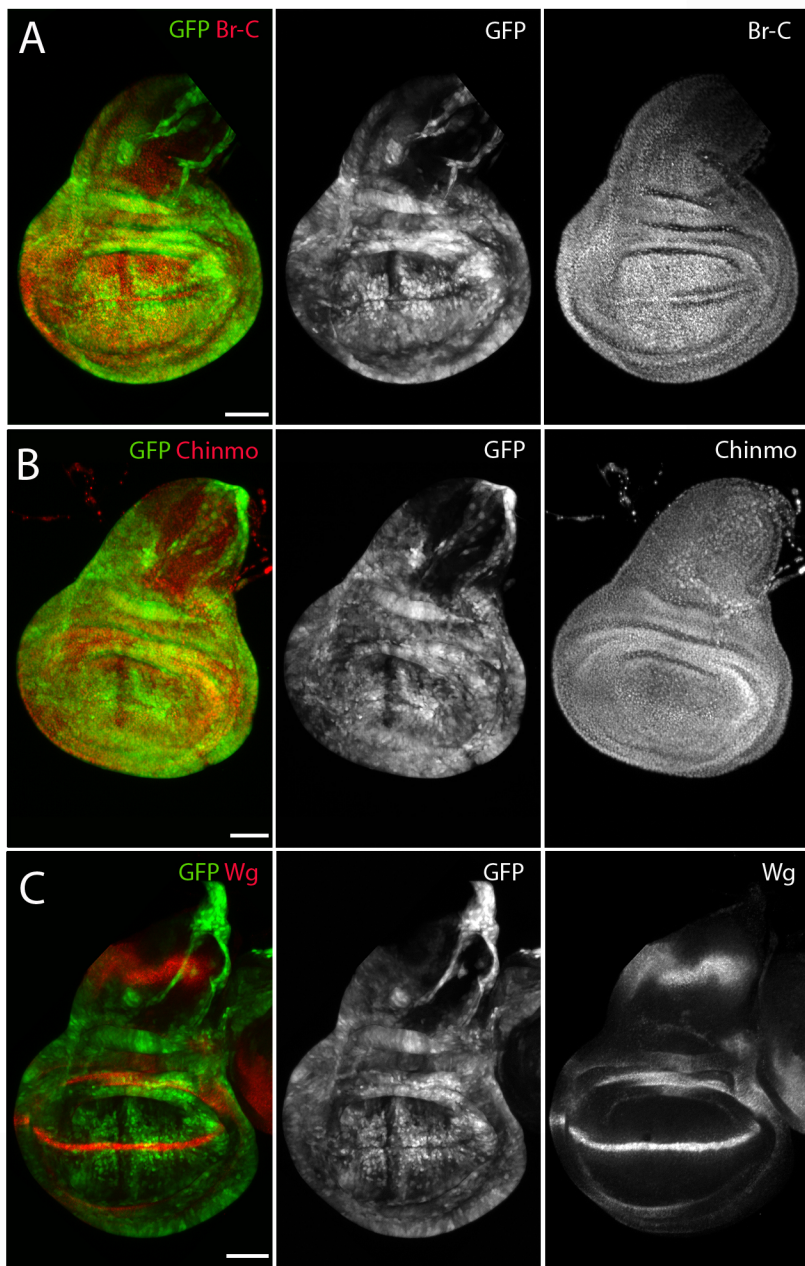

Supplement: supp [file elife-84648-supp-v1.zip]

*fkf-Gal4; UAS-Br-CZ1*

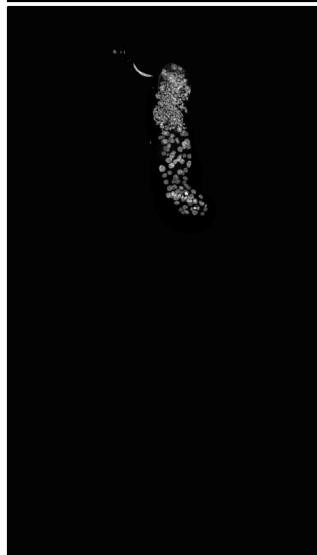

*fkf-Gal4*

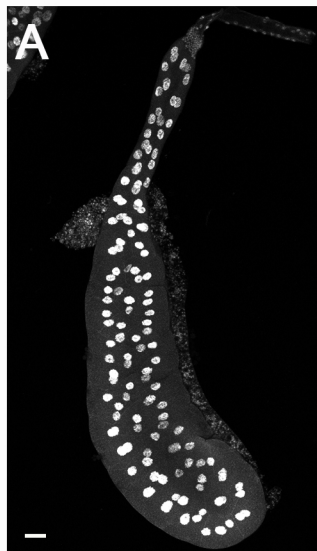

*esg-Gal4 UAS-GFP; UAS-Br-CZ1*

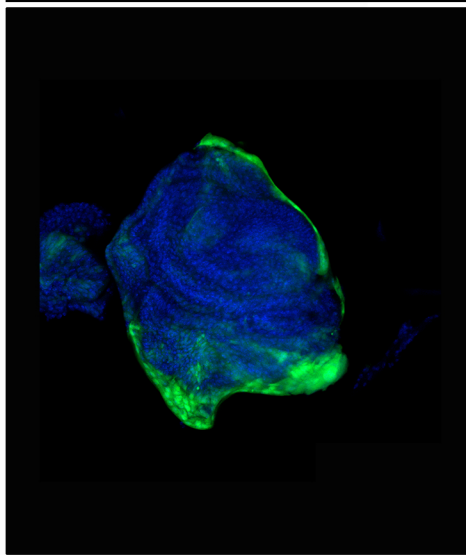

*esg-Gal4 UAS-GFP*

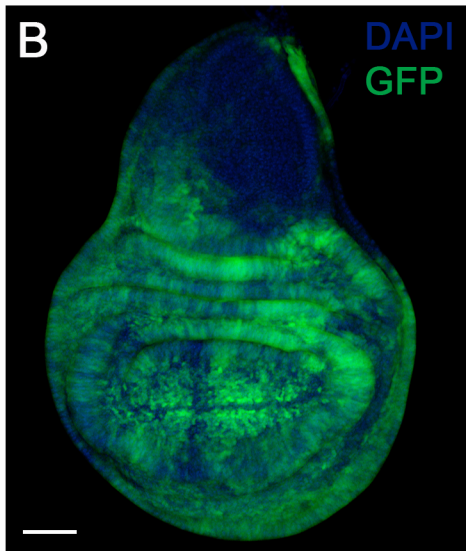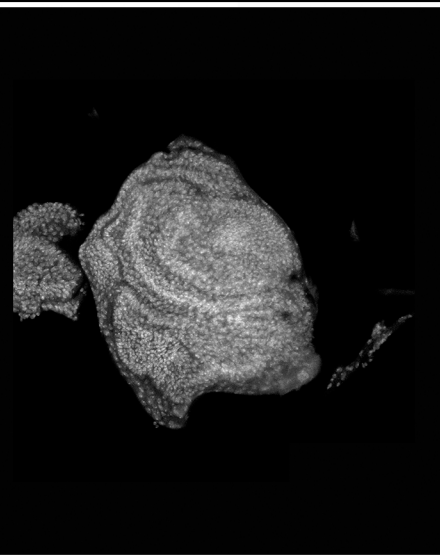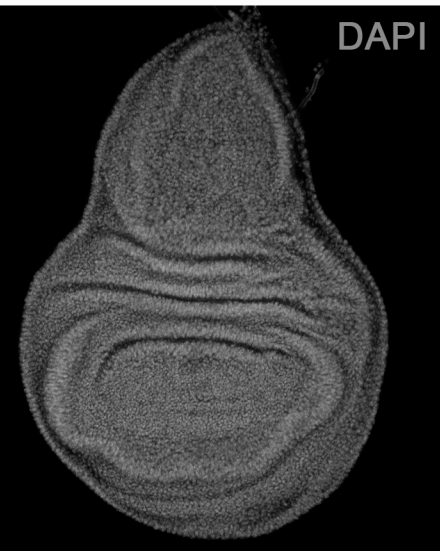

Supplement: supp [file elife-84648-supp-v1.zip]

Control

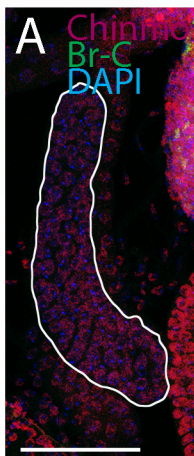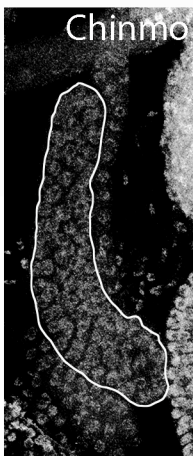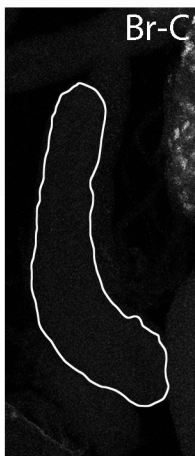

*fkf>chinmo<sup>RNAi</sup>*

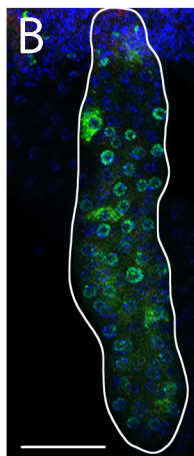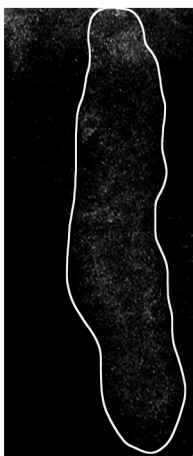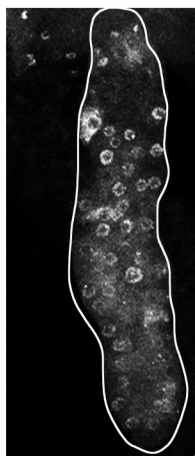

*fkf>chinmo<sup>RNAi</sup>; Br-C<sup>RNAi</sup>*

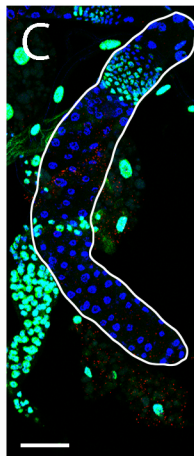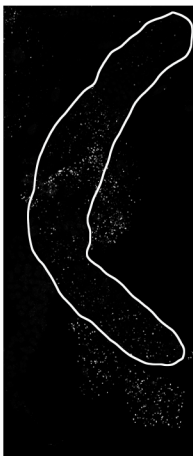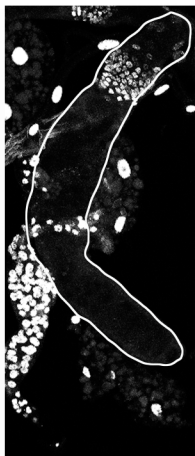

Supplement: supp [file elife-84648-supp-v1.zip]
